# Supplementary material for: Global genomic similarity and core genome sequence diversity of the Streptococcus genus as a toolkit to identify closely related bacterial species in complex environments
Source: PeerJ journal article supplement (doi:10.7717/peerj.6233), 2019-01-14
Supplement: FigS7.pdf [file FigS7.pdf]

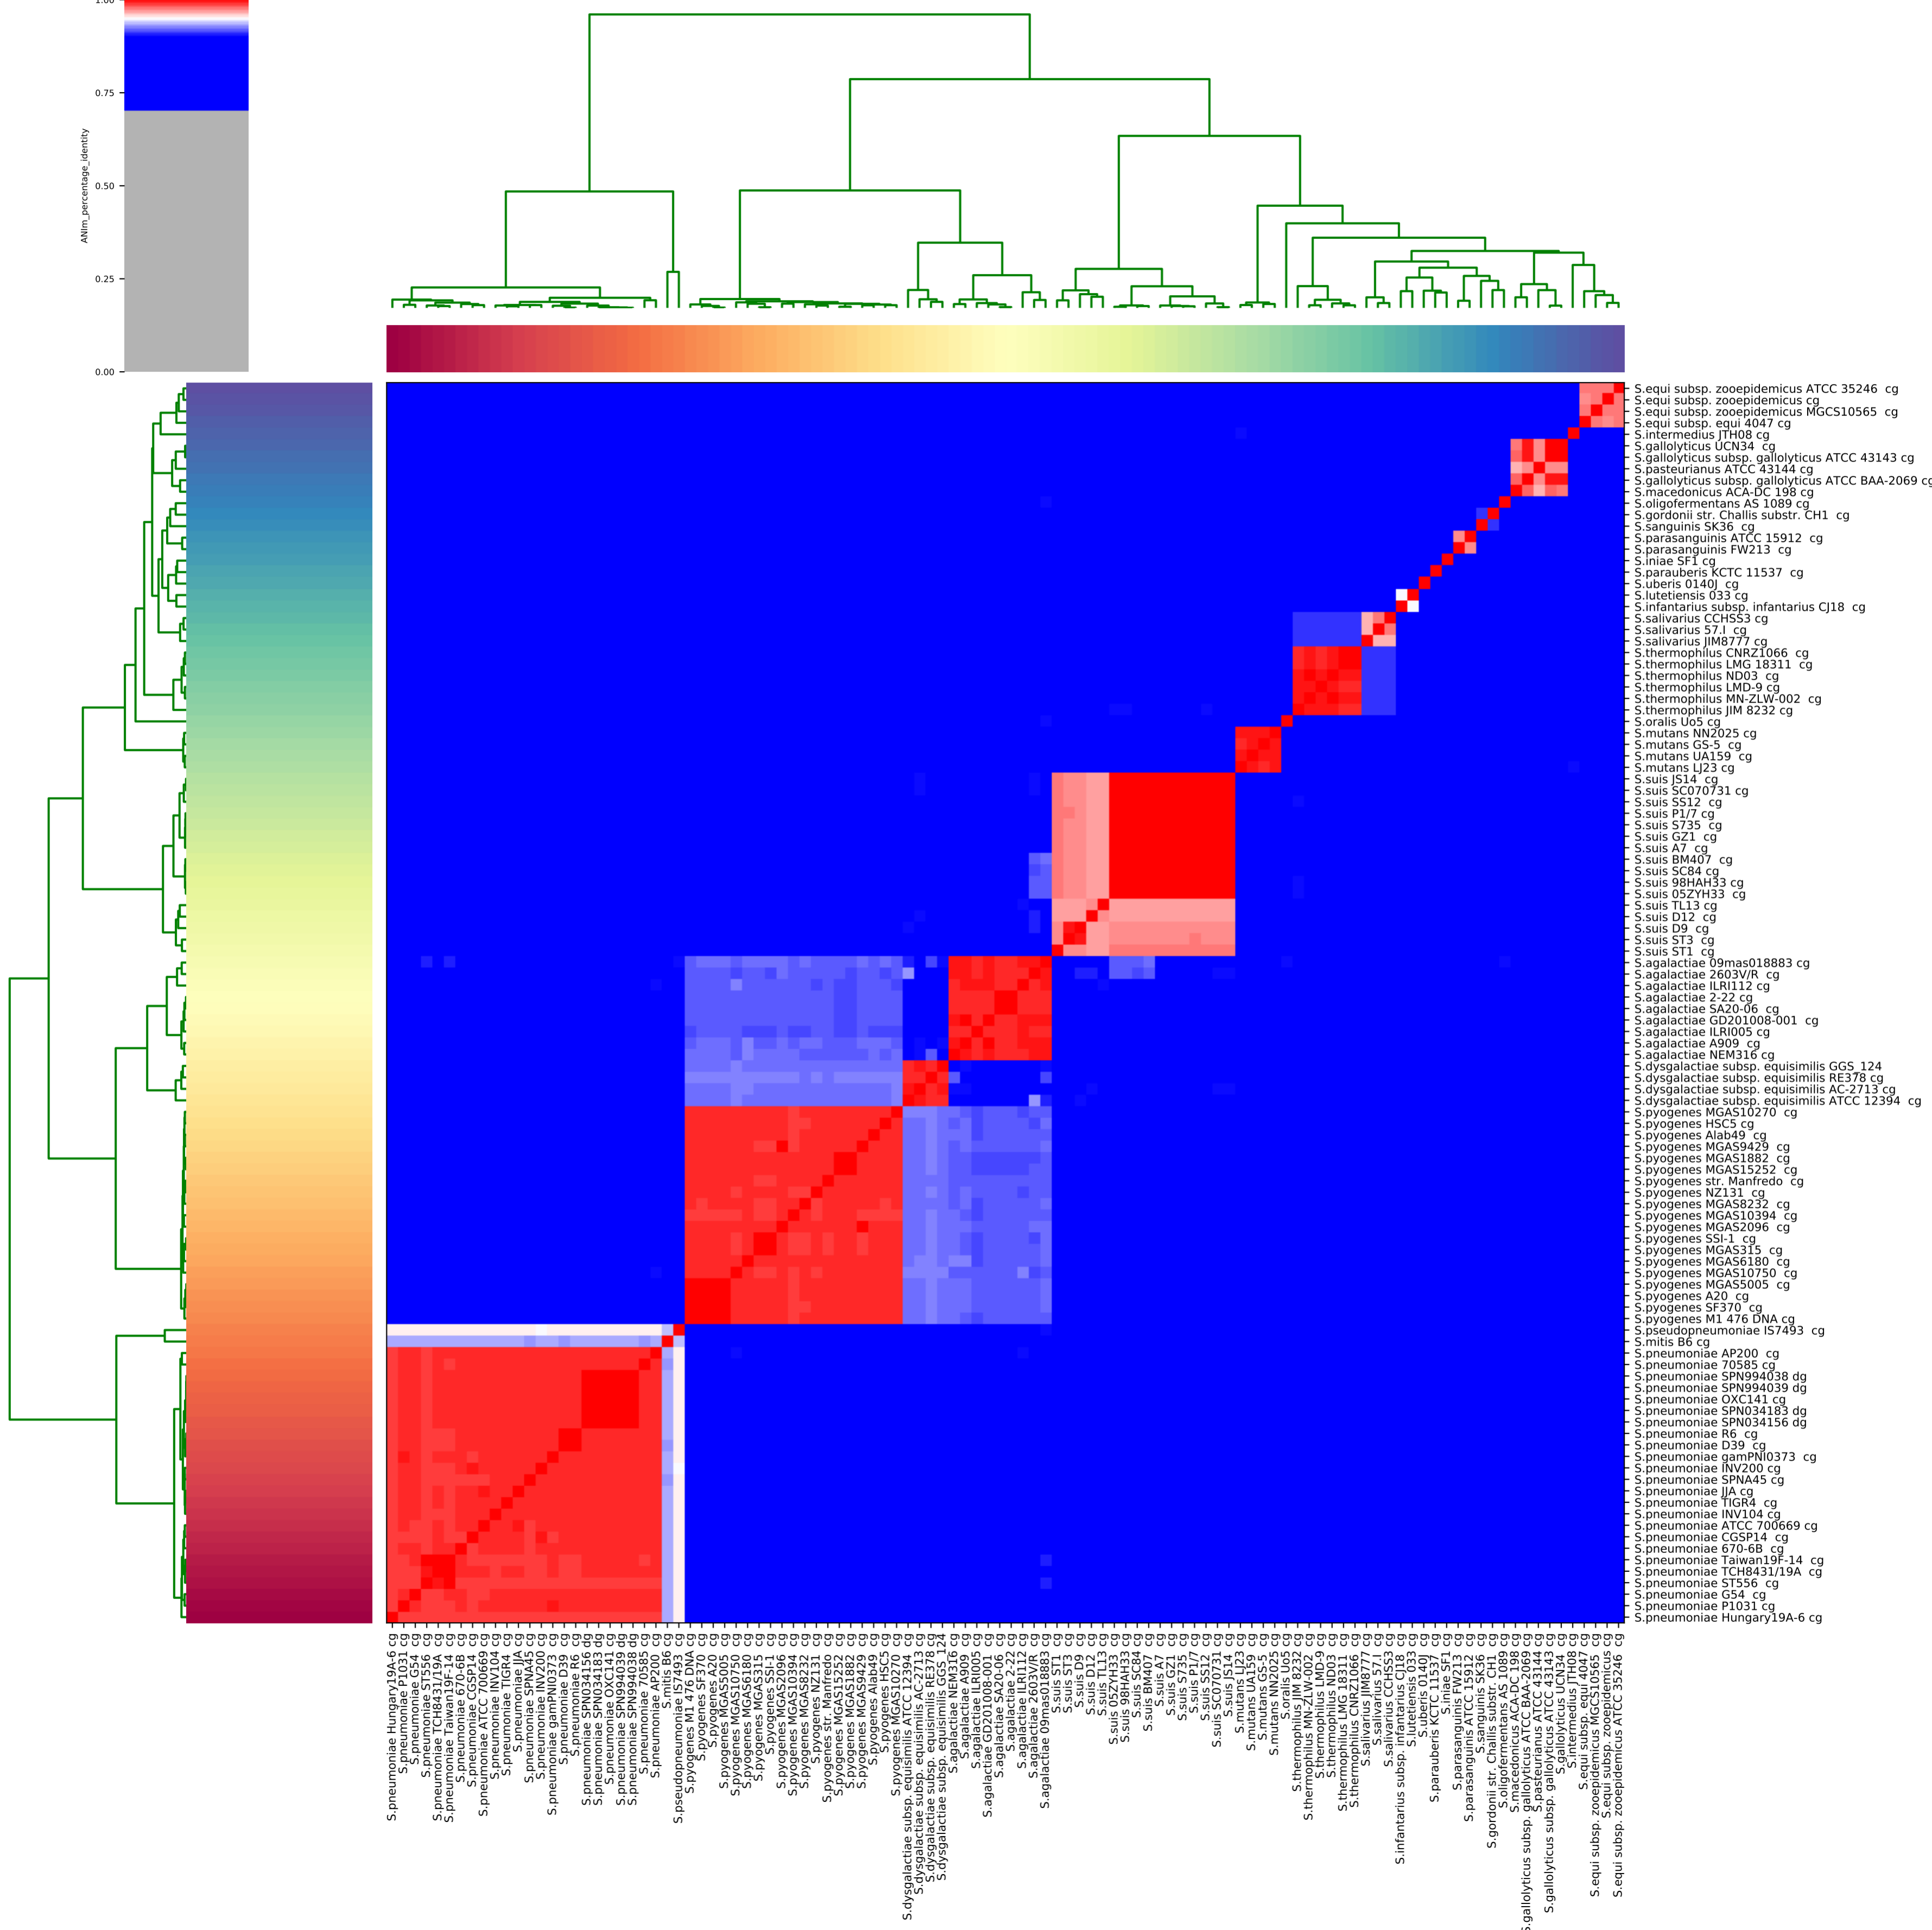

ANim\_percentage\_identity

1.00

0.75

0.50

0.25

0.00

*S. pneumoniae* Hungary19A-6 cg  
*S. pneumoniae* P1031 cg  
*S. pneumoniae* G54 cg  
*S. pneumoniae* S17556 cg  
*S. pneumoniae* TCH8431/19A cg  
*S. pneumoniae* Taiwan19F-14 cg  
*S. pneumoniae* 670-6B cg  
*S. pneumoniae* CGSP14 cg  
*S. pneumoniae* ATCC 700669 cg  
*S. pneumoniae* INV104 cg  
*S. pneumoniae* TIGR4 cg  
*S. pneumoniae* JJA cg  
*S. pneumoniae* SPNA45 cg  
*S. pneumoniae* INV200 cg  
*S. pneumoniae* gamPN10373 cg  
*S. pneumoniae* R6 cg  
*S. pneumoniae* D39 cg  
*S. pneumoniae* SPN034183 dg  
*S. pneumoniae* SPN034156 dg  
*S. pneumoniae* OXC141 cg  
*S. pneumoniae* SPN994039 dg  
*S. pneumoniae* SPN994038 dg  
*S. pneumoniae* 70585 cg  
*S. pneumoniae* AP200 cg  
*S. pseudopneumoniae* 157493 cg  
*S. pyogenes* M1 476 DNA cg  
*S. pyogenes* SF370 cg  
*S. pyogenes* A20 cg  
*S. pyogenes* HSC5 cg  
*S. pyogenes* MGAS5005 cg  
*S. pyogenes* MGAS10750 cg  
*S. pyogenes* MGAS6180 cg  
*S. pyogenes* MGAS315 cg  
*S. pyogenes* SSI-1 cg  
*S. pyogenes* MGAS2096 cg  
*S. pyogenes* MGAS10394 cg  
*S. pyogenes* MGAS9429 cg  
*S. pyogenes* NZ131 cg  
*S. pyogenes* MGAS11882 cg  
*S. pyogenes* MGAS11929 cg  
*S. pyogenes* MGAS1882 cg  
*S. pyogenes* MGAS9429 cg  
*S. pyogenes* Alab49 cg  
*S. pyogenes* HSC5 cg  
*S. pyogenes* MGAS10270 cg  
*S. dysgalactiae* subsp. *equisimilis* ATCC 12394 cg  
*S. dysgalactiae* subsp. *equisimilis* AC-Z713 cg  
*S. dysgalactiae* subsp. *equisimilis* RE378 cg  
*S. dysgalactiae* subsp. *equisimilis* NEM316 cg  
*S. agalactiae* A909 cg  
*S. agalactiae* LLR1005 cg  
*S. agalactiae* GD201008-001 cg  
*S. agalactiae* SA20-06 cg  
*S. agalactiae* 2-22 cg  
*S. agalactiae* LLR1112 cg  
*S. agalactiae* 2603V/R cg  
*S. agalactiae* 09mas018883 cg  
*S. suis* ST1 cg  
*S. suis* D9 cg  
*S. suis* D12 cg  
*S. suis* TL13 cg  
*S. suis* 05ZYH33 cg  
*S. suis* 98HAH33 cg  
*S. suis* SC84 cg  
*S. suis* BM407 cg  
*S. suis* A7 cg  
*S. suis* GZ1 cg  
*S. suis* SF370 cg  
*S. suis* S512 cg  
*S. suis* S517 cg  
*S. suis* SCO70731 cg  
*S. suis* IS14 cg  
*S. mutans* LJ23 cg  
*S. mutans* UA159 cg  
*S. mutans* GS-5 cg  
*S. mutans* NN2025 cg  
*S. oralis* Uo5 cg  
*S. thermophilus* JIM 8232 cg  
*S. thermophilus* MN-ZLW-002 cg  
*S. thermophilus* LMD-9 cg  
*S. thermophilus* NDO3 cg  
*S. thermophilus* LMG 18311 cg  
*S. thermophilus* CNRZ1066 cg  
*S. salivarius* JIM8777 cg  
*S. salivarius* 571 cg  
*S. salivarius* CCH553 cg  
*S. infantarius* subsp. *infantarius* CJ18 cg  
*S. uberis* 0140J cg  
*S. uberis* C1125F1 cg  
*S. parvauberis* KCTC 11537 cg  
*S. parasanguinis* FW213 cg  
*S. parasanguinis* ATCC 15912 cg  
*S. gordonii* str. Challis substr. CH1 cg  
*S. gordonii* str. Challis substr. CH1 cg  
*S. oligofermentans* AS 1089 cg  
*S. macacedonicus* ACA-DC 198 cg  
*S. gallolyticus* subsp. *gallolyticus* ATCC 43144 cg  
*S. gallolyticus* subsp. *gallolyticus* ATCC 43143 cg  
*S. gallolyticus* subsp. *gallolyticus* ATCC BAA-2069 cg  
*S. equi* subsp. *zooepidemicus* ATCC 35246 cg  
*S. equi* subsp. *zooepidemicus* MGCS10565 cg  
*S. equi* subsp. *zooepidemicus* CG  
*S. equi* subsp. *zooepidemicus* 4047 cg  
*S. intermedium* JTH08 cg  
*S. gallolyticus* UCN34 cg
