# Supplementary material for: Global genomic similarity and core genome sequence diversity of the Streptococcus genus as a toolkit to identify closely related bacterial species in complex environments
Source: PubMed Central journal article supplement (PMC6336011; doi:10.7717/peerj.6233), 2019-01-14
Supplement: peerj-07-6233-s002.pdf [file peerj-07-6233-s002.pdf]

## RBH core genome

| Position | Sequence ID | Genus<br>Average<br>identity | SD   | Accession<br>( <i>S. pyogenes</i> str. Manfredo) | Annotation                                                       |
|----------|-------------|------------------------------|------|--------------------------------------------------|------------------------------------------------------------------|
| 1        | 59          | 99.56                        | 0.77 | YP_001127646.1                                   | 30S ribosomal protein S19                                        |
| 2        | 72          | 98.58                        | 1.32 | YP_001127667.1                                   | 30S ribosomal protein S11                                        |
| 3        | 304         | 98.08                        | 1.37 | YP_001128728.1                                   | 50S ribosomal protein L20                                        |
| 4        | 54          | 97.93                        | 1.81 | YP_001127641.1                                   | 30S ribosomal protein S10                                        |
| 5        | 62          | 97.89                        | 1.83 | YP_001127649.1                                   | 50S ribosomal protein L16                                        |
| 6        | 103         | 97.49                        | 2.18 | YP_001129139.1                                   | 50S ribosomal protein L13                                        |
| 7        | 63          | 97.37                        | 2.47 | YP_001127652.1                                   | 50S ribosomal protein L14                                        |
| 8        | 61          | 97.11                        | 2.41 | YP_001127648.1                                   | 30S ribosomal protein S3                                         |
| 9        | 396         | 97.1                         | 1.80 | YP_001129319.1                                   | 30S ribosomal protein S4                                         |
| 10       | 298         | 96.6                         | 2.57 | YP_001128714.1                                   | 50S ribosomal protein L27                                        |
| 11       | 65          | 96.43                        | 2.64 | YP_001127654.1                                   | 50S ribosomal protein L5                                         |
| 12       | 60          | 96.23                        | 4.74 | YP_001127647.1                                   | 50S ribosomal protein L22                                        |
| 13       | 368         | 96.13                        | 2.31 | YP_001127805.1                                   | elongation factor G                                              |
| 14       | 58          | 96.11                        | 3.71 | YP_001127645.1                                   | 50S ribosomal protein L2                                         |
| 15       | 55          | 96.01                        | 2.75 | YP_001127642.1                                   | 50S ribosomal protein L3                                         |
| 16       | 147         | 95.77                        | 2.11 | YP_001128896.1                                   | elongation factor Tu                                             |
| 17       | 76          | 95.77                        | 2.14 | YP_001127937.1                                   | molecular chaperone DnaK                                         |
| 18       | 68          | 95.73                        | 2.57 | YP_001127659.1                                   | 30S ribosomal protein S5                                         |
| 19       | 366         | 95.45                        | 2.79 | YP_001127843.1                                   | phosphoglycerate kinase                                          |
| 20       | 106         | 95.45                        | 2.89 | YP_001128168.1                                   | BipA family GTPase                                               |
| 21       | 2           | 95.24                        | 1.96 | YP_001127607.1                                   | GTP-dependent nucleic acid-binding protein EngD                  |
| 22       | 370         | 95.19                        | 3.29 | YP_001127803.1                                   | 30S ribosomal protein S12                                        |
| 23       | 369         | 95.19                        | 3.65 | YP_001127804.1                                   | 30S ribosomal protein S7                                         |
| 24       | 57          | 95.11                        | 4.89 | YP_001127644.1                                   | 50S ribosomal protein L23                                        |
| 25       | 167         | 94.98                        | 2.97 | YP_001128766.1                                   | FOF1 ATP synthase subunit beta                                   |
| 26       | 126         | 94.95                        | 3.93 | YP_001128787.1                                   | phosphopyruvate hydratase                                        |
| 27       | 73          | 94.89                        | 4.30 | YP_001127668.1                                   | DNA-directed RNA polymerase subunit alpha                        |
| 28       | 97          | 94.82                        | 3.29 | YP_001127676.1                                   | DNA-directed RNA polymerase subunit beta                         |
| 29       | 66          | 94.31                        | 3.60 | YP_001127656.1                                   | 30S ribosomal protein S8                                         |
| 30       | 56          | 94.21                        | 4.97 | YP_001127643.1                                   | 50S ribosomal protein L4                                         |
| 31       | 358         | 94.07                        | 4.02 | YP_001127886.1                                   | 30S ribosomal protein S6                                         |
| 32       | 372         | 93.96                        | 3.13 | YP_001127727.1                                   | adenylosuccinate synthetase                                      |
| 33       | 166         | 93.88                        | 4.30 | YP_001128768.1                                   | FOF1 ATP synthase subunit alpha                                  |
| 34       | 98          | 93.88                        | 3.84 | YP_001127677.1                                   | DNA-directed RNA polymerase subunit beta'                        |
| 35       | 404         | 93.78                        | 3.61 | YP_001129342.1                                   | inosine 5'-monophosphate dehydrogenase                           |
| 36       | 43          | 93.72                        | 3.59 | YP_001127754.1                                   | queuine tRNA-ribosyltransferase                                  |
| 37       | 211         | 93.66                        | 3.68 | YP_001129345.1                                   | ABC transporter ATP-binding protein                              |
| 38       | 253         | 93.58                        | 3.44 | YP_001128484.1                                   | peptide chain release factor 1                                   |
| 39       | 319         | 93.44                        | 4.72 | YP_001129003.1                                   | GTP-binding protein Era                                          |
| 40       | 64          | 93.37                        | 3.73 | YP_001127653.1                                   | 50S ribosomal protein L24                                        |
| 41       | 325         | 93.11                        | 4.58 | YP_001129053.1                                   | ATP-dependent Clp protease proteolytic subunit                   |
| 42       | 305         | 92.89                        | 6.45 | YP_001128730.1                                   | translation initiation factor IF-3                               |
| 43       | 90          | 92.49                        | 4.69 | YP_001127818.1                                   | hypothetical protein SpyM50224                                   |
| 44       | 399         | 92.14                        | 3.32 | YP_001129325.1                                   | tRNA-specific 2-thiouridylase MnmA                               |
| 45       | 69          | 91.98                        | 4.40 | YP_001127661.1                                   | 50S ribosomal protein L15                                        |
| 46       | 383         | 91.94                        | 3.87 | YP_001129237.1                                   | chaperonin GroEL                                                 |
| 47       | 336         | 91.92                        | 4.02 | YP_001129091.1                                   | GTP-binding protein EngA                                         |
| 48       | 262         | 91.58                        | 5.19 | YP_001128642.1                                   | 30S ribosomal protein S1                                         |
| 49       | 237         | 91.17                        | 5.33 | YP_001128438.1                                   | GMP synthase                                                     |
| 50       | 149         | 91.17                        | 3.94 | YP_001128270.1                                   | recombination protein RecR                                       |
| 51       | 28          | 91.01                        | 3.84 | YP_001127948.1                                   | (3R)-hydroxymyristoyl-ACP dehydratase                            |
| 52       | 367         | 90.81                        | 5.90 | YP_001127806.1                                   | glyceraldehyde-3-phosphate dehydrogenase                         |
| 53       | 388         | 90.8                         | 5.38 | YP_001129272.1                                   | recombinase A                                                    |
| 54       | 387         | 90.61                        | 6.50 | YP_001129271.1                                   | Spx family transcriptional regulator                             |
| 55       | 373         | 90.48                        | 5.83 | YP_001129255.1                                   | elongation factor Ts                                             |
| 56       | 265         | 90.01                        | 5.04 | YP_001128647.1                                   | DNA topoisomerase IV subunit B                                   |
| 57       | 174         | 89.91                        | 5.53 | YP_001128551.1                                   | phosphoglucosamine mutase                                        |
| 58       | 230         | 89.86                        | 5.47 | YP_001128909.1                                   | lysyl-tRNA synthetase                                            |
| 59       | 14          | 89.83                        | 6.38 | YP_001128037.1                                   | DNA-directed RNA polymerase subunit omega                        |
| 60       | 242         | 89.77                        | 6.21 | YP_001128404.1                                   | phosphate ABC transporter permease                               |
| 61       | 133         | 89.58                        | 6.78 | YP_001128956.1                                   | response regulator protein                                       |
| 62       | 320         | 89.4                         | 6.33 | YP_001129013.1                                   | ribosome recycling factor                                        |
| 63       | 13          | 89.36                        | 5.56 | YP_001128036.1                                   | guanylate kinase                                                 |
| 64       | 67          | 89.33                        | 5.52 | YP_001127657.1                                   | 50S ribosomal protein L6                                         |
| 65       | 159         | 89.29                        | 5.70 | YP_001128320.1                                   | methionine aminopeptidase                                        |
| 66       | 86          | 89.09                        | 5.60 | YP_001127814.1                                   | ABC transporter ATP-binding protein                              |
| 67       | 238         | 89.08                        | 5.95 | YP_001128442.1                                   | signal recognition particle protein                              |
| 68       | 84          | 88.96                        | 6.15 | YP_001127837.1                                   | fructose-bisphosphate aldolase                                   |
| 69       | 179         | 88.88                        | 7.07 | YP_001128372.1                                   | pyruvate kinase                                                  |
| 70       | 364         | 88.82                        | 5.25 | YP_001127846.1                                   | glutamine synthetase                                             |
| 71       | 234         | 88.82                        | 5.67 | YP_001128532.1                                   | tRNA modification GTPase TrmE                                    |
| 72       | 130         | 88.69                        | 8.96 | YP_001128973.1                                   | catabolite control protein A                                     |
| 73       | 346         | 88.65                        | 6.60 | YP_001127928.1                                   | aspartyl/glutamyl-tRNA amidotransferase subunit A                |
| 74       | 169         | 88.64                        | 7.74 | YP_001128761.2                                   | phenylalanyl-tRNA synthetase subunit alpha                       |
| 75       | 144         | 88.6                         | 7.06 | YP_001128912.1                                   | peptidase                                                        |
| 76       | 220         | 88.53                        | 5.92 | YP_001127956.1                                   | mannose-specific phosphotransferase system (PTS), IIAB component |
| 77       | 333         | 88.42                        | 6.75 | YP_001129085.1                                   | transcription elongation factor GreA                             |
| 78       | 236         | 88.18                        | 7.96 | YP_001128474.1                                   | L-lactate dehydrogenase                                          |
| 79       | 226         | 87.74                        | 7.10 | YP_001127674.1                                   | tyrosyl-tRNA synthetase                                          |

## RBH core genome

|     |     |       |       |                |                                                                                  |
|-----|-----|-------|-------|----------------|----------------------------------------------------------------------------------|
| 80  | 280 | 87.55 | 6.58  | YP_001128530.1 | 50S ribosomal protein L10                                                        |
| 81  | 386 | 87.48 | 6.44  | YP_001129266.1 | anaerobic ribonucleoside triphosphate reductase                                  |
| 82  | 239 | 87.36 | 5.18  | YP_001128441.1 | DNA-binding protein                                                              |
| 83  | 36  | 87.33 | 6.66  | YP_001127969.1 | transcription elongation factor NusA                                             |
| 84  | 394 | 87.09 | 6.98  | YP_001129303.1 | aspartyl-tRNA synthetase                                                         |
| 85  | 206 | 87.04 | 8.60  | YP_001127697.1 | tRNA-dihydrouridine synthase                                                     |
| 86  | 326 | 86.96 | 6.55  | YP_001129071.1 | ribosomal large subunit pseudouridine synthase B                                 |
| 87  | 223 | 86.96 | 6.31  | YP_001127769.1 | NAD(P)H-dependent glycerol-3-phosphate dehydrogenase                             |
| 88  | 148 | 86.89 | 9.57  | YP_001128895.1 | triosephosphate isomerase                                                        |
| 89  | 345 | 86.61 | 7.38  | YP_001129116.1 | GTP-binding protein YqeH                                                         |
| 90  | 263 | 86.41 | 7.35  | YP_001128644.1 | branched-chain amino acid aminotransferase                                       |
| 91  | 274 | 86.31 | 6.12  | YP_001128629.1 | adenine phosphoribosyltransferase                                                |
| 92  | 77  | 86.31 | 7.01  | YP_001127938.1 | chaperone protein DnaJ                                                           |
| 93  | 156 | 86.18 | 7.91  | YP_001128308.1 | uridine kinase                                                                   |
| 94  | 375 | 86.14 | 6.81  | YP_001129164.1 | prolyl-tRNA synthetase                                                           |
| 95  | 241 | 86.02 | 7.76  | YP_001128406.1 | phosphate transporter ATP-binding protein                                        |
| 96  | 222 | 85.91 | 5.75  | YP_001127768.1 | UTP-glucose-1-phosphate uridylyltransferase 2                                    |
| 97  | 50  | 85.87 | 5.59  | YP_001127634.1 | Holliday junction DNA helicase RuvB                                              |
| 98  | 381 | 85.81 | 7.71  | YP_001129175.1 | GTP pyrophosphokinase                                                            |
| 99  | 40  | 85.79 | 8.24  | YP_001127973.1 | ribosome-binding factor A                                                        |
| 100 | 35  | 85.78 | 6.75  | YP_001127967.1 | tRNA (guanine-N(7)-)-methyltransferase                                           |
| 101 | 183 | 85.64 | 6.49  | YP_001128473.1 | DNA gyrase subunit A                                                             |
| 102 | 356 | 85.54 | 11.11 | YP_001127890.1 | CorA-like Mg2+ transporter protein                                               |
| 103 | 196 | 85.47 | 7.13  | YP_001129044.1 | exodeoxyribonuclease                                                             |
| 104 | 371 | 85.45 | 8.27  | YP_001127801.1 | pur operon repressor                                                             |
| 105 | 158 | 85.34 | 6.55  | YP_001128316.1 | UDP-N-acetylglucosamine 1-carboxyvinyltransferase                                |
| 106 | 349 | 85.33 | 7.43  | YP_001127903.1 | preprotein translocase subunit SecA                                              |
| 107 | 281 | 85.32 | 6.41  | YP_001128665.1 | ribosome biogenesis GTP-binding protein YsxC                                     |
| 108 | 154 | 85.27 | 8.49  | YP_001128283.1 | superoxide dismutase                                                             |
| 109 | 397 | 85.16 | 9.08  | YP_001129321.1 | replicative DNA helicase                                                         |
| 110 | 113 | 85.13 | 8.05  | YP_001128180.1 | isoleucyl-tRNA synthetase                                                        |
| 111 | 180 | 85.09 | 7.66  | YP_001128374.1 | glucosamine-fructose-6-phosphate aminotransferase                                |
| 112 | 37  | 85.03 | 8.04  | YP_001127970.1 | hypothetical protein SpyM50380                                                   |
| 113 | 120 | 84.99 | 7.53  | YP_001128873.1 | cell division ATP-binding protein                                                |
| 114 | 18  | 84.85 | 9.33  | YP_001128045.1 | response regulator protein                                                       |
| 115 | 357 | 84.81 | 9.25  | YP_001127887.1 | single-stranded DNA-binding protein                                              |
| 116 | 23  | 84.79 | 6.94  | YP_001127943.1 | enoyl-ACP reductase                                                              |
| 117 | 70  | 84.71 | 10.34 | YP_001127662.1 | preprotein translocase subunit SecY                                              |
| 118 | 250 | 84.69 | 6.78  | YP_001128430.1 | formate-tetrahydrofolate ligase                                                  |
| 119 | 315 | 84.64 | 7.25  | YP_001128982.1 | SsrA-binding protein                                                             |
| 120 | 182 | 84.63 | 9.81  | YP_001128475.1 | NADH oxidase                                                                     |
| 121 | 292 | 84.61 | 7.25  | YP_001128694.1 | tRNA (guanine-N(1)-)-methyltransferase                                           |
| 122 | 258 | 84.59 | 8.50  | YP_001128518.1 | spermidine/putrescine ABC transporter permease                                   |
| 123 | 395 | 84.44 | 7.91  | YP_001129304.1 | histidyl-tRNA synthetase                                                         |
| 124 | 219 | 84.43 | 10.16 | YP_001127954.1 | PTS system mannose-specific transporter subunit IID                              |
| 125 | 71  | 84.4  | 7.98  | YP_001127663.1 | adenylate kinase                                                                 |
| 126 | 151 | 84.38 | 8.72  | YP_001128275.1 | DEAD/DEAH box helicase                                                           |
| 127 | 334 | 84.29 | 6.74  | YP_001129088.1 | UDP-N-acetylmuramate-L-alanine ligase                                            |
| 128 | 30  | 84.27 | 9.13  | YP_001127951.1 | acetyl-CoA carboxylase subunit alpha                                             |
| 129 | 12  | 84.25 | 7.67  | YP_001128027.1 | RNA methylase family protein                                                     |
| 130 | 363 | 84.22 | 6.77  | YP_001127851.1 | DNA-binding/iron metalloprotein/AP endonuclease                                  |
| 131 | 139 | 84.22 | 9.37  | YP_001128918.1 | HPr kinase/phosphorylase                                                         |
| 132 | 254 | 84.19 | 9.69  | YP_001128485.1 | thymidine kinase                                                                 |
| 133 | 29  | 84.11 | 8.91  | YP_001127950.1 | acetyl-CoA carboxylase subunit beta                                              |
| 134 | 374 | 84.1  | 9.20  | YP_001129163.1 | DNA polymerase III PolC                                                          |
| 135 | 276 | 84.09 | 8.53  | YP_001128632.1 | ribonuclease Z                                                                   |
| 136 | 283 | 84.08 | 6.55  | YP_001128669.1 | thymidylate synthase                                                             |
| 137 | 344 | 84.01 | 8.42  | YP_001129114.1 | nicotinic acid mononucleotide adenyllyltransferase                               |
| 138 | 191 | 84.01 | 7.72  | YP_001128657.1 | LysR family transcriptional regulator                                            |
| 139 | 309 | 83.94 | 8.28  | YP_001129062.1 | manganese-dependent inorganic pyrophosphatase                                    |
| 140 | 359 | 83.74 | 8.43  | YP_001127882.1 | thioredoxin                                                                      |
| 141 | 205 | 83.73 | 9.25  | YP_001127698.1 | Hsp33-like chaperonin                                                            |
| 142 | 248 | 83.62 | 6.67  | YP_001128654.1 | orotate phosphoribosyltransferase                                                |
| 143 | 270 | 83.6  | 9.63  | YP_001128572.1 | 7,8-dihydro-8-oxoguanine-triphosphatase                                          |
| 144 | 102 | 83.5  | 6.85  | YP_001129144.1 | SpoU rRNA methylase family protein                                               |
| 145 | 260 | 83.4  | 8.46  | YP_001128382.1 | DNA helicase II                                                                  |
| 146 | 95  | 83.31 | 8.26  | YP_001127672.1 | ABC transporter ATP-binding protein                                              |
| 147 | 257 | 83.28 | 9.00  | YP_001128517.1 | spermidine/putrescine ABC transporter permease                                   |
| 148 | 82  | 83.27 | 7.60  | YP_001127833.1 | trigger factor                                                                   |
| 149 | 294 | 83.26 | 10.18 | YP_001128710.1 | bifunctional pyrimidine regulatory protein PyrR/uracil phosphoribosyltransferase |
| 150 | 244 | 83.08 | 11.60 | YP_001128398.1 | Spx family transcriptional regulator                                             |
| 151 | 264 | 82.84 | 8.90  | YP_001128645.1 | DNA topoisomerase IV subunit A                                                   |
| 152 | 83  | 82.84 | 8.10  | YP_001127774.1 | deoxyuridine 5'-triphosphate nucleotidohydrolase                                 |
| 153 | 123 | 82.79 | 8.96  | YP_001128865.1 | hypothetical protein SpyM51324                                                   |
| 154 | 266 | 82.74 | 9.40  | YP_001128564.1 | Zn-dependent hydrolase                                                           |
| 155 | 398 | 82.59 | 9.32  | YP_001129322.1 | 50S ribosomal protein L9                                                         |
| 156 | 25  | 82.46 | 8.84  | YP_001127945.1 | 3-ketoacyl-ACP reductase                                                         |
| 157 | 311 | 82.33 | 9.47  | YP_001129064.1 | transporter                                                                      |
| 158 | 347 | 82.3  | 10.64 | YP_001127927.1 | aspartyl/glutamyl-tRNA amidotransferase subunit C                                |
| 159 | 122 | 82.26 | 7.82  | YP_001128866.1 | hypothetical protein SpyM51325                                                   |
| 160 | 240 | 82.24 | 11.62 | YP_001128407.1 | phosphate transport system protein                                               |
| 161 | 175 | 82.01 | 9.33  | YP_001128549.1 | coproporphyrinogen III oxidase                                                   |

## RBH core genome

|     |     |       |       |                |                                                                        |
|-----|-----|-------|-------|----------------|------------------------------------------------------------------------|
| 162 | 299 | 81.94 | 7.73  | YP_001128718.1 | thiamine biosynthesis protein ThiI                                     |
| 163 | 177 | 81.69 | 10.26 | YP_001128547.1 | haloacid dehalogenase-like hydrolase                                   |
| 164 | 26  | 81.63 | 10.15 | YP_001127946.1 | 3-oxoacyl-(acyl carrier protein) synthase II                           |
| 165 | 293 | 81.47 | 9.41  | YP_001128695.1 | 16S rRNA-processing protein RimM                                       |
| 166 | 295 | 81.29 | 8.36  | YP_001128711.1 | RNA pseudouridylylase                                                  |
| 167 | 390 | 81.15 | 10.37 | YP_001129275.1 | Holliday junction DNA helicase RuvA                                    |
| 168 | 354 | 81.13 | 18.45 | YP_001127893.1 | cytidine and deoxycytidylate deaminase                                 |
| 169 | 227 | 80.87 | 9.67  | YP_001128264.1 | dihydroorotate dehydrogenase 1A                                        |
| 170 | 42  | 80.84 | 8.48  | YP_001127749.1 | DNA polymerase I                                                       |
| 171 | 171 | 80.79 | 8.66  | YP_001128561.1 | ABC transporter ATP-binding protein                                    |
| 172 | 109 | 80.67 | 11.18 | YP_001128173.1 | cell division protein                                                  |
| 173 | 310 | 80.57 | 10.34 | YP_001129063.1 | pyruvate formate-lyase activating enzyme                               |
| 174 | 255 | 80.51 | 11.97 | YP_001128497.1 | inorganic polyphosphate/ATP-NAD kinase                                 |
| 175 | 7   | 80.45 | 9.29  | YP_001127995.1 | glycyl-tRNA synthetase subunit beta                                    |
| 176 | 259 | 80.4  | 10.28 | YP_001128520.1 | UDP-N-acetylenolpyruvoylglucosamine reductase                          |
| 177 | 313 | 80.38 | 8.44  | YP_001128747.1 | hypothetical protein SpyM51206                                         |
| 178 | 279 | 80.34 | 10.98 | YP_001128533.1 | dipeptidase PepV                                                       |
| 179 | 378 | 80.25 | 10.06 | YP_001129167.1 | undecaprenyl pyrophosphate synthase                                    |
| 180 | 87  | 80.18 | 9.17  | YP_001127815.1 | hypothetical protein SpyM50221                                         |
| 181 | 1   | 80.1  | 13.94 | YP_001127604.1 | chromosomal replication initiation protein                             |
| 182 | 342 | 80.07 | 11.75 | YP_001129111.1 | hypothetical protein SpyM51588                                         |
| 183 | 306 | 80.02 | 11.43 | YP_001128731.1 | cytidylate kinase                                                      |
| 184 | 380 | 79.95 | 10.26 | YP_001129174.1 | D-tyrosyl-tRNA(Tyr) deacylase                                          |
| 185 | 207 | 79.88 | 9.33  | YP_001129160.1 | peptide deformylase                                                    |
| 186 | 96  | 79.79 | 10.32 | YP_001127673.1 | ABC transporter permease                                               |
| 187 | 391 | 79.74 | 10.11 | YP_001129277.1 | DNA mismatch repair protein                                            |
| 188 | 150 | 79.59 | 8.58  | YP_001128271.1 | D-alanyl-alanine synthetase A                                          |
| 189 | 190 | 79.57 | 11.63 | YP_001128503.1 | redox-sensing transcriptional repressor Rex                            |
| 190 | 33  | 79.55 | 9.49  | YP_001127964.1 | ABC transporter ATP-binding protein                                    |
| 191 | 247 | 79.46 | 10.79 | YP_001128649.1 | dihydroorotase                                                         |
| 192 | 290 | 79.4  | 8.24  | YP_001128689.1 | 1-phosphofructokinase                                                  |
| 193 | 307 | 79.31 | 10.88 | YP_001128735.1 | peptidase T                                                            |
| 194 | 198 | 79.2  | 8.71  | YP_001129100.1 | 16S rRNA methyltransferase GidB                                        |
| 195 | 215 | 79.18 | 9.68  | YP_001128024.1 | Holliday junction-specific endonuclease                                |
| 196 | 101 | 79.1  | 9.52  | YP_001129146.1 | hypothetical protein SpyM51627                                         |
| 197 | 193 | 79.09 | 10.84 | YP_001128469.1 | hypothetical protein SpyM50910                                         |
| 198 | 143 | 79.03 | 12.44 | YP_001128913.1 | peptidase                                                              |
| 199 | 353 | 79.01 | 13.70 | YP_001127895.1 | hypothetical protein SpyM50304                                         |
| 200 | 400 | 78.91 | 11.59 | YP_001129329.1 | cobalt transport protein                                               |
| 201 | 243 | 78.73 | 11.61 | YP_001128402.1 | phosphate ABC transporter, extracellular phosphate-binding lipoprotein |
| 202 | 79  | 78.61 | 8.27  | YP_001127828.1 | tRNA pseudouridine synthase A                                          |
| 203 | 125 | 78.59 | 12.79 | YP_001128795.1 | flavodoxin                                                             |
| 204 | 267 | 78.48 | 9.61  | YP_001128566.1 | ABC transporter permease                                               |
| 205 | 331 | 78.38 | 8.98  | YP_001129078.1 | glutamate racemase                                                     |
| 206 | 200 | 78.2  | 9.18  | YP_001127921.1 | L-asparaginase                                                         |
| 207 | 155 | 78.2  | 9.54  | YP_001128291.1 | O-methyltransferase                                                    |
| 208 | 117 | 78.14 | 11.59 | YP_001128196.1 | DNA repair protein                                                     |
| 209 | 88  | 78.13 | 8.31  | YP_001127816.1 | cysteine desulfurase                                                   |
| 210 | 38  | 78.08 | 12.10 | YP_001127971.1 | hypothetical protein SpyM50381                                         |
| 211 | 256 | 78.05 | 13.32 | YP_001128516.1 | spermidine/putrescine extracellular binding protein                    |
| 212 | 360 | 77.98 | 11.68 | YP_001127880.1 | DNA mismatch repair protein                                            |
| 213 | 75  | 77.9  | 11.78 | YP_001127936.1 | heat shock protein GrpE                                                |
| 214 | 362 | 77.88 | 12.19 | YP_001127858.1 | DNA-binding protein                                                    |
| 215 | 114 | 77.87 | 11.70 | YP_001128191.1 | exodeoxyribonuclease VII large subunit                                 |
| 216 | 134 | 77.83 | 13.26 | YP_001128955.1 | sensor histidine kinase                                                |
| 217 | 351 | 77.78 | 9.51  | YP_001127901.1 | fructokinase                                                           |
| 218 | 194 | 77.73 | 9.85  | YP_001128349.1 | glutamine ABC transporter, glutamine-binding protein/permease protein  |
| 219 | 393 | 77.72 | 12.78 | YP_001129302.1 | hypothetical protein SpyM51787                                         |
| 220 | 168 | 77.65 | 14.79 | YP_001128765.1 | FOF1 ATP synthase subunit epsilon                                      |
| 221 | 39  | 77.63 | 9.26  | YP_001127972.1 | translation initiation factor IF-2                                     |
| 222 | 74  | 77.49 | 13.08 | YP_001127935.1 | heat-inducible transcription repressor                                 |
| 223 | 189 | 77.4  | 10.21 | YP_001128502.1 | hypothetical protein SpyM50945                                         |
| 224 | 9   | 77.33 | 10.96 | YP_001128013.1 | phospho-N-acetylmuramoyl-pentapeptide-transferase                      |
| 225 | 152 | 77.29 | 12.41 | YP_001128279.1 | 1-acyl-sn-glycerol-3-phosphate acyltransferase                         |
| 226 | 316 | 77.22 | 11.95 | YP_001128983.1 | exoribonuclease R                                                      |
| 227 | 340 | 77.19 | 12.78 | YP_001129105.1 | ABC transporter permease                                               |
| 228 | 135 | 76.99 | 11.03 | YP_001128953.1 | ribonuclease III                                                       |
| 229 | 202 | 76.94 | 14.08 | YP_001127897.1 | sucrose operon repressor                                               |
| 230 | 350 | 76.82 | 11.08 | YP_001127902.1 | mannose-6-phosphate isomerase                                          |
| 231 | 121 | 76.67 | 9.55  | YP_001128868.1 | aspartate aminotransferase                                             |
| 232 | 10  | 76.67 | 13.06 | YP_001128015.1 | ABC transporter permease                                               |
| 233 | 21  | 76.53 | 14.43 | YP_001127940.1 | MarR family transcriptional regulator                                  |
| 234 | 229 | 76.52 | 13.74 | YP_001128923.1 | hypothetical protein SpyM51383                                         |
| 235 | 161 | 76.49 | 9.14  | YP_001128774.1 | NAD-dependent DNA ligase LigA                                          |
| 236 | 162 | 76.24 | 20.85 | YP_001128773.1 | lipid kinase                                                           |
| 237 | 301 | 76.1  | 9.31  | YP_001128724.1 | chorismate synthase                                                    |
| 238 | 107 | 75.98 | 9.61  | YP_001128170.1 | UDP-N-acetylmuramoyl-L-alanyl-D-glutamate synthetase                   |
| 239 | 321 | 75.97 | 10.18 | YP_001129017.1 | DNA translocase FtsK                                                   |
| 240 | 249 | 75.93 | 10.13 | YP_001128655.1 | orotidine 5'-phosphate decarboxylase                                   |
| 241 | 377 | 75.62 | 13.17 | YP_001129166.1 | phosphatidate cytidyltransferase                                       |
| 242 | 297 | 75.31 | 12.69 | YP_001128713.1 | LysR family transcriptional regulator                                  |
| 243 | 146 | 75.01 | 13.22 | YP_001128898.1 | cell division protein                                                  |

## RBH core genome

|     |     |       |       |                |                                                                                  |
|-----|-----|-------|-------|----------------|----------------------------------------------------------------------------------|
| 244 | 157 | 74.88 | 12.56 | YP_001128311.1 | hypothetical protein SpyM50747                                                   |
| 245 | 291 | 74.68 | 13.86 | YP_001128693.1 | pyridine nucleotide-disulfide oxidoreductase family protein                      |
| 246 | 15  | 74.62 | 12.67 | YP_001128040.1 | 16S rRNA m(5)C 967 methyltransferase                                             |
| 247 | 382 | 74.61 | 12.42 | YP_001129180.1 | 16S ribosomal RNA methyltransferase RsmE                                         |
| 248 | 16  | 74.56 | 14.93 | YP_001128041.1 | protein phosphatase                                                              |
| 249 | 401 | 74.41 | 11.01 | YP_001129331.1 | cobalt transporter ATP-binding subunit                                           |
| 250 | 376 | 74.38 | 11.70 | YP_001129165.1 | pheromone-processing membrane metalloprotease                                    |
| 251 | 145 | 74.36 | 10.86 | YP_001128899.1 | phosphoenolpyruvate carboxylase                                                  |
| 252 | 118 | 74.28 | 11.77 | YP_001128198.1 | hypothetical protein SpyM50627                                                   |
| 253 | 235 | 74.18 | 11.92 | YP_001128412.1 | pantothenate kinase                                                              |
| 254 | 322 | 74.12 | 11.89 | YP_001129026.1 | ADP-ribose pyrophosphatase                                                       |
| 255 | 3   | 74.08 | 11.86 | YP_001127608.1 | peptidyl-tRNA hydrolase                                                          |
| 256 | 216 | 74.06 | 9.95  | YP_001128029.2 | S-ribosylhomocysteinase                                                          |
| 257 | 343 | 73.79 | 13.71 | YP_001129113.1 | hypothetical protein SpyM51590                                                   |
| 258 | 100 | 73.64 | 13.95 | YP_001127686.1 | hypothetical protein SpyM50091                                                   |
| 259 | 6   | 73.57 | 14.68 | YP_001127991.1 | N-acetylglucosamine-6-phosphate deacetylase                                      |
| 260 | 221 | 73.45 | 13.04 | YP_001127963.1 | HIT-family protein                                                               |
| 261 | 108 | 73.45 | 10.62 | YP_001128171.1 | undecaprenyldiphospho-muramoylpentapeptide beta-N- acetylglucosaminyltransferase |
| 262 | 302 | 73.43 | 12.69 | YP_001128725.1 | 3-dehydroquinate dehydratase                                                     |
| 263 | 323 | 73.4  | 17.67 | YP_001129049.1 | DNA replication initiation control protein YabA                                  |
| 264 | 172 | 73.38 | 14.49 | YP_001128553.1 | hypothetical protein SpyM50998                                                   |
| 265 | 210 | 73.36 | 13.96 | YP_001129340.1 | recombination protein F                                                          |
| 266 | 185 | 73.36 | 12.58 | YP_001128440.1 | GntR family transcriptional regulator                                            |
| 267 | 330 | 73.33 | 11.08 | YP_001129076.1 | phosphoesterase                                                                  |
| 268 | 246 | 73.21 | 12.79 | YP_001128466.1 | ribonuclease HII                                                                 |
| 269 | 332 | 73.1  | 15.29 | YP_001129080.1 | hypothetical protein SpyM51557                                                   |
| 270 | 89  | 73    | 11.83 | YP_001127817.1 | NifU-like protein                                                                |
| 271 | 140 | 72.81 | 12.38 | YP_001128917.1 | prolipoprotein diacylglycerol transferase                                        |
| 272 | 337 | 72.52 | 16.04 | YP_001129092.1 | primosomal protein Dnal                                                          |
| 273 | 339 | 72.33 | 18.12 | YP_001129099.1 | LemA family protein                                                              |
| 274 | 132 | 72.3  | 14.58 | YP_001128971.1 | 1,2-diacylglycerol 3-glucosyltransferase                                         |
| 275 | 218 | 72.18 | 12.45 | YP_001127953.1 | hypothetical protein SpyM50363                                                   |
| 276 | 318 | 72.17 | 11.97 | YP_001128989.1 | formamidopyrimidine-DNA glycosylase                                              |
| 277 | 181 | 72.08 | 11.12 | YP_001128413.1 | 16S rRNA m(2)G 1207 methyltransferase                                            |
| 278 | 261 | 71.96 | 21.45 | YP_001128709.1 | uracil permease                                                                  |
| 279 | 81  | 71.87 | 10.74 | YP_001127831.1 | hypothetical protein SpyM50240                                                   |
| 280 | 160 | 71.85 | 13.70 | YP_001128775.1 | hypothetical protein SpyM51236                                                   |
| 281 | 327 | 71.81 | 11.39 | YP_001129072.1 | segregation and condensation protein B                                           |
| 282 | 24  | 71.74 | 11.96 | YP_001127944.1 | acyl-carrier-protein S-malonyltransferase                                        |
| 283 | 153 | 71.56 | 13.73 | YP_001128282.1 | DNA polymerase III subunit delta                                                 |
| 284 | 286 | 71.47 | 15.87 | YP_001128674.1 | mevalonate diphosphate decarboxylase                                             |
| 285 | 115 | 71.47 | 15.12 | YP_001128193.1 | geranyltranstransferase                                                          |
| 286 | 303 | 71.41 | 12.47 | YP_001128726.1 | hypothetical protein SpyM51184                                                   |
| 287 | 22  | 71.37 | 11.60 | YP_001127941.1 | 3-oxoacyl-ACP synthase                                                           |
| 288 | 284 | 71.25 | 16.18 | YP_001128672.1 | isopentenyl pyrophosphate isomerase                                              |
| 289 | 271 | 71.14 | 12.14 | YP_001128625.1 | NIF3 (NGG1p interacting factor 3) family protein                                 |
| 290 | 199 | 71.02 | 12.52 | YP_001127923.1 | universal stress protein                                                         |
| 291 | 124 | 70.91 | 16.90 | YP_001128800.1 | zinc-binding protein AdcA precursor                                              |
| 292 | 289 | 70.83 | 12.19 | YP_001128683.1 | tRNA CCA-pyrophosphorylase                                                       |
| 293 | 392 | 70.71 | 19.25 | YP_001129297.1 | arginine repressor                                                               |
| 294 | 192 | 70.65 | 11.74 | YP_001128670.1 | 3-hydroxy-3-methylglutaryl coenzyme A synthase                                   |
| 295 | 20  | 70.53 | 14.92 | YP_001127939.1 | enoyl-CoA hydratase                                                              |
| 296 | 314 | 70.49 | 14.67 | YP_001128363.1 | 4-alpha-glucanotransferase                                                       |
| 297 | 275 | 70.41 | 15.27 | YP_001128631.1 | short chain dehydrogenase                                                        |
| 298 | 178 | 70.34 | 13.85 | YP_001128370.1 | DNA polymerase III DnaE                                                          |
| 299 | 94  | 70.22 | 16.73 | YP_001127671.1 | MarR family transcriptional regulator                                            |
| 300 | 195 | 70.17 | 14.78 | YP_001128977.1 | glucosyl transferase                                                             |
| 301 | 348 | 69.97 | 12.08 | YP_001127905.1 | alanine racemase                                                                 |
| 302 | 209 | 69.78 | 17.06 | YP_001129318.1 | TetR family transcriptional regulator                                            |
| 303 | 365 | 69.71 | 13.49 | YP_001127844.1 | hypothetical protein SpyM50253                                                   |
| 304 | 44  | 69.64 | 13.99 | YP_001128415.1 | lipoprotein                                                                      |
| 305 | 214 | 69.58 | 16.27 | YP_001128023.1 | penicillin-binding protein 1A                                                    |
| 306 | 251 | 69.56 | 15.51 | YP_001128478.1 | hypothetical protein SpyM50921                                                   |
| 307 | 328 | 69.54 | 12.55 | YP_001129073.1 | segregation and condensation protein A                                           |
| 308 | 232 | 69.49 | 15.93 | YP_001128904.1 | N-acetylmuramoyl-L-alanine amidase                                               |
| 309 | 213 | 69.4  | 17.17 | YP_001129348.1 | serine protease                                                                  |
| 310 | 46  | 69.33 | 16.73 | YP_001127782.1 | membrane protein OxaA 1 precursor                                                |
| 311 | 278 | 69.31 | 14.91 | YP_001129006.1 | uracil DNA glycosylase superfamily protein                                       |
| 312 | 131 | 69.16 | 21.67 | YP_001128972.1 | glycosyltransferase                                                              |
| 313 | 45  | 69.05 | 14.79 | YP_001127781.1 | ribonuclease P                                                                   |
| 314 | 127 | 68.75 | 12.45 | YP_001128322.1 | 3-phosphoshikimate 1-carboxyvinyltransferase                                     |
| 315 | 197 | 68.73 | 17.62 | YP_001129084.1 | OxaA-like protein precursor                                                      |
| 316 | 272 | 68.71 | 12.74 | YP_001128626.1 | hypothetical protein SpyM51076                                                   |
| 317 | 19  | 68.43 | 12.55 | YP_001128047.1 | hypothetical protein SpyM50461                                                   |
| 318 | 233 | 68.41 | 16.57 | YP_001128313.1 | biotin--protein ligase                                                           |
| 319 | 201 | 68.13 | 14.53 | YP_001127898.1 | sucrose-6-phosphate hydrolase                                                    |
| 320 | 308 | 68.12 | 18.26 | YP_001129055.1 | polysaccharide biosynthesis protein                                              |
| 321 | 204 | 67.88 | 16.53 | YP_001127876.1 | signal peptidase I                                                               |
| 322 | 296 | 67.65 | 14.64 | YP_001128712.1 | lipoprotein signal peptidase                                                     |
| 323 | 85  | 67.65 | 17.62 | YP_001127812.1 | adaptor protein                                                                  |
| 324 | 273 | 67.61 | 16.28 | YP_001128628.1 | DNA replication protein DnaD                                                     |
| 325 | 188 | 67.32 | 12.42 | YP_001128501.1 | cysteine desulfurase                                                             |

## RBH core genome

|     |     |       |       |                |                                                                |
|-----|-----|-------|-------|----------------|----------------------------------------------------------------|
| 326 | 110 | 67.17 | 13.24 | YP_001128175.1 | hypothetical protein SpyM50604                                 |
| 327 | 184 | 67.13 | 19.77 | YP_001128472.1 | sortase A                                                      |
| 328 | 31  | 67.07 | 18.87 | YP_001127958.1 | permease                                                       |
| 329 | 27  | 67.06 | 13.06 | YP_001127947.1 | acetyl-CoA carboxylase biotin carboxyl carrier protein subunit |
| 330 | 8   | 67.06 | 19.49 | YP_001128011.1 | cell division protein                                          |
| 331 | 245 | 66.92 | 14.07 | YP_001128397.1 | bifunctional riboflavin kinase/FMN adenylyltransferase         |
| 332 | 17  | 66.74 | 19.07 | YP_001128044.1 | sensor histidine kinase                                        |
| 333 | 138 | 66.5  | 12.69 | YP_001128928.1 | cell division protein FtsY                                     |
| 334 | 389 | 66.02 | 16.91 | YP_001129274.1 | DNA-3-methyladenine glycosylase                                |
| 335 | 186 | 65.89 | 14.38 | YP_001128420.1 | hypothetical protein SpyM50861                                 |
| 336 | 51  | 65.85 | 13.36 | YP_001127635.1 | phosphotyrosine protein phosphatase                            |
| 337 | 141 | 65.71 | 18.02 | YP_001128916.1 | hypothetical protein SpyM51375                                 |
| 338 | 136 | 65.68 | 14.27 | YP_001128952.1 | chromosome partition protein                                   |
| 339 | 163 | 65.14 | 21.90 | YP_001128771.1 | F0F1 ATP synthase subunit A                                    |
| 340 | 252 | 65.04 | 14.62 | YP_001128483.1 | methyltransferase                                              |
| 341 | 203 | 64.95 | 12.80 | YP_001127877.1 | ribonuclease HIII                                              |
| 342 | 352 | 64.92 | 21.60 | YP_001127899.1 | PTS system sucrose-specific transporter subunit IIABC          |
| 343 | 32  | 64.84 | 17.48 | YP_001127961.1 | LytR family transcriptional regulator                          |
| 344 | 300 | 64.78 | 19.20 | YP_001128723.1 | hypothetical protein SpyM51181                                 |
| 345 | 92  | 64.68 | 17.43 | YP_001127824.1 | oligopeptide transporter ATP-binding protein                   |
| 346 | 384 | 64.57 | 16.66 | YP_001129238.1 | co-chaperonin GroES                                            |
| 347 | 355 | 64.46 | 21.04 | YP_001127889.1 | hypothetical protein SpyM50298                                 |
| 348 | 231 | 64.3  | 15.41 | YP_001128907.1 | phosphoglycerate mutase family protein                         |
| 349 | 228 | 64.24 | 17.53 | YP_001128871.1 | metallo-beta-lactamase superfamily protein                     |
| 350 | 277 | 63.91 | 16.90 | YP_001128633.1 | hypothetical protein SpyM51083                                 |
| 351 | 11  | 63.81 | 14.12 | YP_001128025.1 | hypothetical protein SpyM50438                                 |
| 352 | 187 | 63.51 | 15.85 | YP_001128499.1 | adenylate cyclase family protein                               |
| 353 | 341 | 63.39 | 18.90 | YP_001128504.1 | peptidase                                                      |
| 354 | 47  | 63.24 | 19.31 | YP_001127783.1 | ssDNA-binding protein                                          |
| 355 | 41  | 63.09 | 19.81 | YP_001127976.1 | copper-transporting ATPase                                     |
| 356 | 317 | 63.06 | 14.79 | YP_001128988.1 | dephospho-CoA kinase                                           |
| 357 | 224 | 63.03 | 18.73 | YP_001127832.1 | mechanosensitive ion channel protein                           |
| 358 | 164 | 62.92 | 21.52 | YP_001128770.1 | F0F1 ATP synthase subunit B                                    |
| 359 | 93  | 62.58 | 18.95 | YP_001127825.1 | oligopeptide transporter ATP-binding protein                   |
| 360 | 385 | 62.55 | 16.84 | YP_001129263.1 | acetyltransferase (GNAT) family protein                        |
| 361 | 208 | 62.52 | 13.27 | YP_001129234.1 | RNA pseudouridylylase synthase                                 |
| 362 | 217 | 62.46 | 13.93 | YP_001128049.1 | hypothetical protein SpyM50463                                 |
| 363 | 170 | 62.46 | 15.61 | YP_001128753.1 | ATP-dependent exonuclease subunit A                            |
| 364 | 173 | 61.69 | 24.17 | YP_001128552.1 | hypothetical protein SpyM50997                                 |
| 365 | 53  | 61.31 | 16.50 | YP_001127640.1 | MATE family transporter                                        |
| 366 | 324 | 61.06 | 19.23 | YP_001129050.1 | DNA polymerase III subunit delta'                              |
| 367 | 129 | 60.98 | 16.33 | YP_001128324.1 | cell envelope-related function transcriptional attenuator      |
| 368 | 80  | 60.85 | 14.50 | YP_001127829.1 | phosphomethylpyrimidine kinase                                 |
| 369 | 268 | 60.64 | 15.87 | YP_001128568.1 | hypothetical protein SpyM51016                                 |
| 370 | 116 | 60.48 | 22.35 | YP_001128195.1 | repressor protein                                              |
| 371 | 104 | 59.68 | 15.88 | YP_001128158.1 | phosphopantetheine adenylyltransferase                         |
| 372 | 176 | 59.34 | 20.24 | YP_001128548.1 | acyl-ACP thioesterase                                          |
| 373 | 137 | 59.13 | 21.10 | YP_001128930.1 | haloacid dehalogenase-like hydrolase                           |
| 374 | 282 | 59.09 | 17.93 | YP_001128668.1 | dihydrofolate reductase                                        |
| 375 | 165 | 59    | 22.86 | YP_001128769.1 | F0F1 ATP synthase subunit delta                                |
| 376 | 379 | 58.98 | 21.46 | YP_001129168.1 | preprotein translocase subunit YajC                            |
| 377 | 403 | 58.88 | 20.05 | YP_001129335.1 | hypothetical protein SpyM51822                                 |
| 378 | 52  | 58.52 | 17.99 | YP_001127636.1 | hypothetical protein SpyM50037                                 |
| 379 | 5   | 58.52 | 16.54 | YP_001127614.1 | PP-loop family protein                                         |
| 380 | 128 | 58.22 | 16.04 | YP_001128323.1 | shikimate kinase                                               |
| 381 | 338 | 57.91 | 17.47 | YP_001129097.1 | hypothetical protein SpyM51574                                 |
| 382 | 285 | 57.88 | 18.47 | YP_001128673.1 | phosphomevalonate kinase                                       |
| 383 | 4   | 57.83 | 18.77 | YP_001127613.1 | hypothetical protein SpyM50010                                 |
| 384 | 119 | 57.11 | 18.07 | YP_001128889.1 | hypothetical protein SpyM51348                                 |
| 385 | 212 | 56.87 | 16.88 | YP_001129346.1 | ABC transporter permease                                       |
| 386 | 111 | 56.57 | 18.19 | YP_001128176.1 | hypothetical protein SpyM50605                                 |
| 387 | 34  | 56.39 | 17.84 | YP_001127965.1 | ABC transporter                                                |
| 388 | 105 | 56.23 | 18.46 | YP_001128161.1 | hypothetical protein SpyM50590                                 |
| 389 | 312 | 56.13 | 17.98 | YP_001129067.1 | PAP2 superfamily protein                                       |
| 390 | 225 | 56.05 | 17.57 | YP_001127820.1 | D-alanyl-D-alanine carboxypeptidase                            |
| 391 | 48  | 55.77 | 34.57 | YP_001127790.1 | N-acetylneuraminidase lyase                                    |
| 392 | 361 | 54.69 | 17.98 | YP_001127879.1 | hypothetical protein SpyM50288                                 |
| 393 | 402 | 54.41 | 19.22 | YP_001129334.1 | protease                                                       |
| 394 | 78  | 54.34 | 19.62 | YP_001128433.1 | GntR family transcriptional regulator                          |
| 395 | 112 | 54.23 | 19.20 | YP_001128178.1 | RNA binding protein                                            |
| 396 | 99  | 54.16 | 20.99 | YP_001127678.1 | DNA binding protein                                            |
| 397 | 329 | 53.06 | 19.26 | YP_001129074.1 | site-specific tyrosine recombinase XerD                        |
| 398 | 49  | 52.36 | 28.03 | YP_001127791.1 | ROK family protein                                             |
| 399 | 335 | 50.54 | 20.45 | YP_001129089.1 | hypothetical protein SpyM51566                                 |
| 400 | 287 | 50.5  | 23.81 | YP_001127772.1 | ABC transporter ATP-binding protein                            |
| 401 | 142 | 48.99 | 24.37 | YP_001128915.1 | hypothetical protein SpyM51374                                 |
| 402 | 269 | 46.95 | 28.77 | YP_001128182.1 | Mut/NUDIX family protein                                       |
| 403 | 91  | 43.95 | 27.79 | YP_001127823.1 | oligopeptide transporter permease                              |
| 404 | 288 | 42.63 | 22.63 | YP_001127771.1 | ABC transporter ATP-binding protein                            |

# RBH-GETHOMOLOGUES shared hits

| Position | Sequence number | Genus<br>Average identity | SD   | Accession<br>(S. pyogenes str. Manfredo) | Annotation                                                      |
|----------|-----------------|---------------------------|------|------------------------------------------|-----------------------------------------------------------------|
| 1        | 59              | 99.56                     | 0.77 | YP_001127646.1                           | 30S ribosomal protein S19                                       |
| 2        | 72              | 98.58                     | 1.32 | YP_001127667.1                           | 30S ribosomal protein S11                                       |
| 3        | 304             | 98.08                     | 1.37 | YP_001128728.1                           | 50S ribosomal protein L20                                       |
| 5        | 62              | 97.89                     | 1.83 | YP_001127649.1                           | 50S ribosomal protein L16                                       |
| 6        | 103             | 97.49                     | 2.18 | YP_001129139.1                           | 50S ribosomal protein L13                                       |
| 7        | 63              | 97.37                     | 2.47 | YP_001127652.1                           | 50S ribosomal protein L14                                       |
| 8        | 61              | 97.11                     | 2.41 | YP_001127648.1                           | 30S ribosomal protein S3                                        |
| 10       | 298             | 96.6                      | 2.57 | YP_001128714.1                           | 50S ribosomal protein L27                                       |
| 11       | 65              | 96.43                     | 2.64 | YP_001127654.1                           | 50S ribosomal protein L5                                        |
| 12       | 60              | 96.23                     | 4.74 | YP_001127647.1                           | 50S ribosomal protein L22                                       |
| 13       | 368             | 96.13                     | 2.31 | YP_001127805.1                           | translation elongation factor G                                 |
| 14       | 58              | 96.11                     | 3.71 | YP_001127645.1                           | 50S ribosomal protein L2                                        |
| 16       | 147             | 95.77                     | 2.11 | YP_001128896.1                           | elongation factor Tu                                            |
| 17       | 76              | 95.77                     | 2.14 | YP_001127937.1                           | Chaperone protein DnaK                                          |
| 18       | 68              | 95.73                     | 2.57 | YP_001127659.1                           | 30S ribosomal protein S5                                        |
| 21       | 2               | 95.24                     | 1.96 | YP_001127607.1                           | GTP-dependent nucleic acid-binding protein                      |
| 22       | 370             | 95.19                     | 3.29 | YP_001127803.1                           | 30S ribosomal protein S12                                       |
| 23       | 369             | 95.19                     | 3.65 | YP_001127804.1                           | 30S ribosomal protein S7                                        |
| 24       | 57              | 95.11                     | 4.89 | YP_001127644.1                           | 50S ribosomal protein L23                                       |
| 25       | 167             | 94.98                     | 2.97 | YP_001128766.1                           | H <sup>+</sup> -transporting ATP synthase beta chain            |
| 26       | 126             | 94.95                     | 3.93 | YP_001128787.1                           | phosphopyruvate hydratase                                       |
| 27       | 73              | 94.89                     | 4.3  | YP_001127668.1                           | DNA-directed RNA polymerase subunit alpha                       |
| 28       | 97              | 94.82                     | 3.29 | YP_001127676.1                           | DNA-directed RNA polymerase subunit beta                        |
| 29       | 66              | 94.31                     | 3.6  | YP_001127656.1                           | 30S ribosomal protein S8                                        |
| 31       | 358             | 94.07                     | 4.02 | YP_001127886.1                           | 30S ribosomal protein S6                                        |
| 32       | 372             | 93.96                     | 3.13 | YP_001127727.1                           | Adenylosuccinate synthetase                                     |
| 33       | 166             | 93.88                     | 4.3  | YP_001128768.1                           | H <sup>+</sup> -transporting ATP synthase alpha chain           |
| 34       | 98              | 93.88                     | 3.84 | YP_001127677.1                           | DNA-directed RNA polymerase subunit beta'                       |
| 35       | 404             | 93.78                     | 3.61 | YP_001129342.1                           | inosine monophosphate dehydrogenase                             |
| 36       | 43              | 93.72                     | 3.59 | YP_001127754.1                           | tRNA-guanine transglycosylase                                   |
| 38       | 253             | 93.58                     | 3.44 | YP_001128484.1                           | peptide chain release factor 1                                  |
| 39       | 319             | 93.44                     | 4.72 | YP_001129003.1                           | GTP binding proteins                                            |
| 40       | 64              | 93.37                     | 3.73 | YP_001127653.1                           | 50S ribosomal protein L24                                       |
| 43       | 90              | 92.49                     | 4.69 | YP_001127818.1                           | FeS cluster assembly protein                                    |
| 45       | 69              | 91.98                     | 4.4  | YP_001127661.1                           | 50S ribosomal protein L15                                       |
| 47       | 336             | 91.92                     | 4.02 | YP_001129091.1                           | GTP binding protein                                             |
| 49       | 237             | 91.17                     | 5.33 | YP_001128438.1                           | GMP synthetase                                                  |
| 50       | 149             | 91.17                     | 3.94 | YP_001128270.1                           | recombination protein RecR                                      |
| 52       | 367             | 90.81                     | 5.9  | YP_001127806.1                           | glyceraldehyde 3-phosphate dehydrogenase                        |
| 53       | 388             | 90.8                      | 5.38 | YP_001129272.1                           | recombination protein RecA                                      |
| 55       | 373             | 90.48                     | 5.83 | YP_001129255.1                           | translation elongation factor EF-Ts                             |
| 57       | 174             | 89.91                     | 5.53 | YP_001128551.1                           | phospho-sugar mutase                                            |
| 58       | 230             | 89.86                     | 5.47 | YP_001128909.1                           | lysyl-tRNA synthetase                                           |
| 60       | 242             | 89.77                     | 6.21 | YP_001128404.1                           | phosphate ABC transporter (permease)                            |
| 61       | 133             | 89.58                     | 6.78 | YP_001128956.1                           | two-component response regulator                                |
| 62       | 320             | 89.4                      | 6.33 | YP_001129013.1                           | ribosome recycling factor                                       |
| 63       | 13              | 89.36                     | 5.56 | YP_001128036.1                           | guanylate kinase                                                |
| 64       | 67              | 89.33                     | 5.52 | YP_001127657.1                           | 50S ribosomal protein L6                                        |
| 66       | 86              | 89.09                     | 5.6  | YP_001127814.1                           | ABC transporter (ATP-binding protein)                           |
| 67       | 238             | 89.08                     | 5.95 | YP_001128442.1                           | signal recognition particle chain Ffh                           |
| 69       | 179             | 88.88                     | 7.07 | YP_001128372.1                           | pyruvate kinase                                                 |
| 70       | 364             | 88.82                     | 5.25 | YP_001127846.1                           | glutamine synthetase                                            |
| 72       | 130             | 88.69                     | 8.96 | YP_001128973.1                           | catabolite control protein A                                    |
| 73       | 346             | 88.65                     | 6.6  | YP_001127928.1                           | Glutamyl-tRNA Gln amidotransferase subunit A                    |
| 74       | 169             | 88.64                     | 7.74 | YP_001128761.2                           | Phenylalanyl-tRNA synthetase alpha chain                        |
| 77       | 333             | 88.42                     | 6.75 | YP_001129085.1                           | Transcription elongation factor greA                            |
| 78       | 236             | 88.18                     | 7.96 | YP_001128474.1                           | L-Lactate Dehydrogenase                                         |
| 79       | 226             | 87.74                     | 7.1  | YP_001127674.1                           | tyrosyl-tRNA synthetase                                         |
| 80       | 280             | 87.55                     | 6.58 | YP_001128530.1                           | 50S ribosomal protein L10                                       |
| 82       | 239             | 87.36                     | 5.18 | YP_001128441.1                           | putative DNA-binding protein                                    |
| 83       | 36              | 87.33                     | 6.66 | YP_001127969.1                           | transcription termination-antitermination factor nusA           |
| 84       | 394             | 87.09                     | 6.98 | YP_001129303.1                           | aspartyl-tRNA synthetase                                        |
| 85       | 206             | 87.04                     | 8.6  | YP_001127697.1                           | tRNA-dihydrouridine synthase family protein                     |
| 86       | 326             | 86.96                     | 6.55 | YP_001129071.1                           | ribosomal large subunit pseudouridine synthase B (hypothetical) |
| 87       | 223             | 86.96                     | 6.31 | YP_001127769.1                           | NAD(P)H-dependent glycerol-3-phosphate dehydrogenase            |
| 88       | 148             | 86.89                     | 9.57 | YP_001128895.1                           | triosephosphate isomerase                                       |
| 91       | 274             | 86.31                     | 6.12 | YP_001128629.1                           | adenine phosphoribosyltransferase                               |
| 92       | 77              | 86.31                     | 7.01 | YP_001127938.1                           | Chaperone protein DnaJ                                          |
| 93       | 156             | 86.18                     | 7.91 | YP_001128308.1                           | uridine kinase                                                  |
| 94       | 375             | 86.14                     | 6.81 | YP_001129164.1                           | prolyl-tRNA synthetase                                          |
| 96       | 222             | 85.91                     | 5.75 | YP_001127768.1                           | UDP-glucose pyrophosphorylase                                   |
| 97       | 50              | 85.87                     | 5.59 | YP_001127634.1                           | Holliday junction DNA helicase, subunit B                       |
| 98       | 381             | 85.81                     | 7.71 | YP_001129175.1                           | GTP pyrophosphokinase (stringent response protein RelA)         |
| 99       | 40              | 85.79                     | 8.24 | YP_001127973.1                           | ribosome binding factor A                                       |
| 100      | 35              | 85.78                     | 6.75 | YP_001127967.1                           | tRNA (guanine-N(7)-)-methyltransferase                          |

## RBH-GETHOMOLOGUES shared hits

|     |     |       |       |                |                                                                   |
|-----|-----|-------|-------|----------------|-------------------------------------------------------------------|
| 101 | 183 | 85.64 | 6.49  | YP_001128473.1 | DNA gyrase A subunit                                              |
| 104 | 371 | 85.45 | 8.27  | YP_001127801.1 | transcription repressor of purine operon PurR                     |
| 105 | 158 | 85.34 | 6.55  | YP_001128316.1 | UDP-N-acetylglucosamine 1-carboxyvinyltransferase                 |
| 108 | 154 | 85.27 | 8.49  | YP_001128283.1 | manganese-dependent superoxide dismutase                          |
| 109 | 397 | 85.16 | 9.08  | YP_001129321.1 | replicative DNA helicase DnaC                                     |
| 110 | 113 | 85.13 | 8.05  | YP_001128180.1 | isoleucyl-tRNA synthetase                                         |
| 111 | 180 | 85.09 | 7.66  | YP_001128374.1 | glucosamine-fructose-6-phosphate aminotransferase                 |
| 113 | 120 | 84.99 | 7.53  | YP_001128873.1 | cell division ATP-binding protein FtsE                            |
| 114 | 18  | 84.85 | 9.33  | YP_001128045.1 | two-component response regulator                                  |
| 116 | 23  | 84.79 | 6.94  | YP_001127943.1 | putative trans-2-enoyl-ACP reductase II                           |
| 119 | 315 | 84.64 | 7.25  | YP_001128982.1 | SsrA-binding protein                                              |
| 121 | 292 | 84.61 | 7.25  | YP_001128694.1 | tRNA (guanine-N1)-methyltransferase                               |
| 123 | 395 | 84.44 | 7.91  | YP_001129304.1 | histidyl-tRNA synthetase                                          |
| 124 | 219 | 84.43 | 10.16 | YP_001127954.1 | mannose-specific PTS enzyme IID                                   |
| 125 | 71  | 84.4  | 7.98  | YP_001127663.1 | adenylate kinase                                                  |
| 126 | 151 | 84.38 | 8.72  | YP_001128275.1 | ATP-dependent RNA helicase, DEAD-box family                       |
| 127 | 334 | 84.29 | 6.74  | YP_001129088.1 | UDP-N-acetylmuramate-alanine ligase                               |
| 128 | 30  | 84.27 | 9.13  | YP_001127951.1 | acetyl-coenzyme A carboxylase carboxyl transferase subunit alpha  |
| 129 | 12  | 84.25 | 7.67  | YP_001128027.1 | Hypothetical protein GBS222_0064                                  |
| 130 | 363 | 84.22 | 6.77  | YP_001127851.1 | putative DNA-binding/iron metalloprotein/AP endonuclease          |
| 131 | 139 | 84.22 | 9.37  | YP_001128918.1 | Hpr (ser) kinase/phosphatase                                      |
| 133 | 29  | 84.11 | 8.91  | YP_001127950.1 | acetyl-coenzyme A carboxylase carboxyl transferase subunit beta   |
| 134 | 374 | 84.1  | 9.2   | YP_001129163.1 | DNA polymerase III (alpha subunit)                                |
| 135 | 276 | 84.09 | 8.53  | YP_001128632.1 | ribonuclease z                                                    |
| 136 | 283 | 84.08 | 6.55  | YP_001128669.1 | thymidylate synthase                                              |
| 137 | 344 | 84.01 | 8.42  | YP_001129114.1 | probable nicotinate-nucleotide adenyltransferase                  |
| 139 | 309 | 83.94 | 8.28  | YP_001129062.1 | manganese-dependent inorganic pyrophosphatase                     |
| 140 | 359 | 83.74 | 8.43  | YP_001127882.1 | thioredoxin                                                       |
| 141 | 205 | 83.73 | 9.25  | YP_001127698.1 | Hsp33-like chaperonin                                             |
| 142 | 248 | 83.62 | 6.67  | YP_001128654.1 | orotate phosphoribosyltransferase                                 |
| 143 | 270 | 83.6  | 9.63  | YP_001128572.1 | mutator mutT protein                                              |
| 144 | 102 | 83.5  | 6.85  | YP_001129144.1 | tRNA/rRNA methyltransferase                                       |
| 145 | 260 | 83.4  | 8.46  | YP_001128382.1 | ATP-dependent DNA helicase                                        |
| 146 | 95  | 83.31 | 8.26  | YP_001127672.1 | (metal) ABC transporter (ATP-binding protein)                     |
| 150 | 244 | 83.08 | 11.6  | YP_001128398.1 | transcriptional regulator Spx                                     |
| 153 | 123 | 82.79 | 8.96  | YP_001128865.1 | Hypothetical protein GBS222_0508                                  |
| 155 | 398 | 82.59 | 9.32  | YP_001129322.1 | 50S ribosomal protein L9                                          |
| 156 | 25  | 82.46 | 8.84  | YP_001127945.1 | beta-ketoacyl-ACP reductase                                       |
| 157 | 311 | 82.33 | 9.47  | YP_001129064.1 | CBS domain-containing protein                                     |
| 158 | 347 | 82.3  | 10.64 | YP_001127927.1 | Glu-tRNA Gln amidotransferase subunit C                           |
| 159 | 122 | 82.26 | 7.82  | YP_001128866.1 | Hypothetical protein GBS222_0507                                  |
| 161 | 175 | 82.01 | 9.33  | YP_001128549.1 | coproporphyrinogen III oxidase (HemN)                             |
| 162 | 299 | 81.94 | 7.73  | YP_001128718.1 | hypothetical thiamine biosynthesis protein Thil                   |
| 163 | 177 | 81.69 | 10.26 | YP_001128547.1 | N-acetylglucosamine metabolism protein                            |
| 164 | 26  | 81.63 | 10.15 | YP_001127946.1 | 3-oxoacyl-acyl-carrier protein synthase                           |
| 165 | 293 | 81.47 | 9.41  | YP_001128695.1 | Putative 16S rRNA processing protein RimM                         |
| 166 | 295 | 81.29 | 8.36  | YP_001128711.1 | ribosomal large subunit pseudouridine synthase B (hypothetical)   |
| 167 | 390 | 81.15 | 10.37 | YP_001129275.1 | Holliday junction DNA helicase                                    |
| 168 | 354 | 81.13 | 18.45 | YP_001127893.1 | late competence protein required for DNA binding and uptake comEB |
| 169 | 227 | 80.87 | 9.67  | YP_001128264.1 | dihydroorotate dehydrogenase A                                    |
| 170 | 42  | 80.84 | 8.48  | YP_001127749.1 | DNA polymerase I                                                  |
| 171 | 171 | 80.79 | 8.66  | YP_001128561.1 | ABC transporter (ATP-binding protein)                             |
| 172 | 109 | 80.67 | 11.18 | YP_001128173.1 | cell division protein FtsA                                        |
| 174 | 255 | 80.51 | 11.97 | YP_001128497.1 | inorganic polyphosphate/ATP-NAD kinase                            |
| 176 | 259 | 80.4  | 10.28 | YP_001128520.1 | UDP-N-acetylenolpyruvoylglucosamine reductase                     |
| 177 | 313 | 80.38 | 8.44  | YP_001128747.1 | Hypothetical protein GBS222_1175                                  |
| 178 | 279 | 80.34 | 10.98 | YP_001128533.1 | dipeptidase                                                       |
| 179 | 378 | 80.25 | 10.06 | YP_001129167.1 | undecaprenyl pyrophosphate synthetase                             |
| 180 | 87  | 80.18 | 9.17  | YP_001127815.1 | Hypothetical protein GBS222_0291                                  |
| 181 | 1   | 80.1  | 13.94 | YP_001127604.1 | Chromosomal replication initiator protein DnaA                    |
| 182 | 342 | 80.07 | 11.75 | YP_001129111.1 | Hypothetical protein GBS222_1384                                  |
| 183 | 306 | 80.02 | 11.43 | YP_001128731.1 | cytidine monophosphate kinase                                     |
| 184 | 380 | 79.95 | 10.26 | YP_001129174.1 | D-tyrosyl-tRNA(Tyr) deacylase                                     |
| 185 | 207 | 79.88 | 9.33  | YP_001129160.1 | polypeptide deformylase                                           |
| 186 | 96  | 79.79 | 10.32 | YP_001127673.1 | (metal) ABC transporter (permease)                                |
| 188 | 150 | 79.59 | 8.58  | YP_001128271.1 | D-alanine-D-alanine ligase                                        |
| 189 | 190 | 79.57 | 11.63 | YP_001128503.1 | redox-sensing transcriptional repressor Rex                       |
| 190 | 33  | 79.55 | 9.49  | YP_001127964.1 | ABC transporter (ATP-binding protein)                             |
| 193 | 307 | 79.31 | 10.88 | YP_001128735.1 | tripeptidase                                                      |
| 194 | 198 | 79.2  | 8.71  | YP_001129100.1 | Ribosomal RNA small subunit methyltransferase                     |
| 195 | 215 | 79.18 | 9.68  | YP_001128024.1 | recombination protein U (RecU)                                    |
| 196 | 101 | 79.1  | 9.52  | YP_001129146.1 | Hypothetical protein GBS222_0353                                  |
| 197 | 193 | 79.09 | 10.84 | YP_001128469.1 | hemolysin III                                                     |
| 199 | 353 | 79.01 | 13.7  | YP_001127895.1 | Hypothetical protein GBS222_1420                                  |
| 200 | 400 | 78.91 | 11.59 | YP_001129329.1 | putative ABC transporter (permease)                               |
| 202 | 79  | 78.61 | 8.27  | YP_001127828.1 | tRNA pseudouridine synthase A                                     |
| 203 | 125 | 78.59 | 12.79 | YP_001128795.1 | flavodoxin                                                        |

## RBH-GETHOMOLOGUES shared hits

|     |     |       |       |                |                                                                  |
|-----|-----|-------|-------|----------------|------------------------------------------------------------------|
| 205 | 331 | 78.38 | 8.98  | YP_001129078.1 | glutamate racemase                                               |
| 207 | 155 | 78.2  | 9.54  | YP_001128291.1 | methyltransferase                                                |
| 209 | 88  | 78.13 | 8.31  | YP_001127816.1 | aminotransferase, putative cysteine desulfurase                  |
| 210 | 38  | 78.08 | 12.1  | YP_001127971.1 | putative ribosomal protein                                       |
| 212 | 360 | 77.98 | 11.68 | YP_001127880.1 | DNA mismatch repair protein MutS                                 |
| 213 | 75  | 77.9  | 11.78 | YP_001127936.1 | heat shock protein GrpE                                          |
| 215 | 114 | 77.87 | 11.7  | YP_001128191.1 | exodeoxyribonuclease VII large chain                             |
| 216 | 134 | 77.83 | 13.26 | YP_001128955.1 | two-component sensor histidine kinase                            |
| 219 | 393 | 77.72 | 12.78 | YP_001129302.1 | Hypothetical protein GBS222_1711                                 |
| 220 | 168 | 77.65 | 14.79 | YP_001128765.1 | H <sup>+</sup> -transporting ATP synthase epsilon chain          |
| 221 | 39  | 77.63 | 9.26  | YP_001127972.1 | initiation factor 2                                              |
| 222 | 74  | 77.49 | 13.08 | YP_001127935.1 | transcription repressor of class I heat-shock (HrcA)             |
| 224 | 9   | 77.33 | 10.96 | YP_001128013.1 | phospho-N-acetylmuramoyl-pentapeptide transferase                |
| 225 | 152 | 77.29 | 12.41 | YP_001128279.1 | acyltransferase family protein                                   |
| 226 | 316 | 77.22 | 11.95 | YP_001128983.1 | exoribonuclease R                                                |
| 228 | 135 | 76.99 | 11.03 | YP_001128953.1 | ribonuclease III                                                 |
| 230 | 350 | 76.82 | 11.08 | YP_001127902.1 | mannose-6-phosphate isomerase                                    |
| 231 | 121 | 76.67 | 9.55  | YP_001128868.1 | aspartate aminotransferase                                       |
| 233 | 21  | 76.53 | 14.43 | YP_001127940.1 | transcriptional regulator (MarR family)                          |
| 234 | 229 | 76.52 | 13.74 | YP_001128923.1 | Hypothetical protein GBS222_0602                                 |
| 235 | 161 | 76.49 | 9.14  | YP_001128774.1 | DNA ligase                                                       |
| 236 | 162 | 76.24 | 20.85 | YP_001128773.1 | putative lipid kinase                                            |
| 237 | 301 | 76.1  | 9.31  | YP_001128724.1 | chorismate synthase                                              |
| 238 | 107 | 75.98 | 9.61  | YP_001128170.1 | UDP-N-acetylmuramoylalanine--D-glutamate ligase                  |
| 239 | 321 | 75.97 | 10.18 | YP_001129017.1 | DNA translocase                                                  |
| 240 | 249 | 75.93 | 10.13 | YP_001128655.1 | orotidine 5-phosphate decarboxylase                              |
| 241 | 377 | 75.62 | 13.17 | YP_001129166.1 | phosphatidate cytidyltransferase (CDP-diglyceride synthase)      |
| 243 | 146 | 75.01 | 13.22 | YP_001128898.1 | cell cycle protein FtsW                                          |
| 244 | 157 | 74.88 | 12.56 | YP_001128311.1 | GAF domain-containing protein                                    |
| 245 | 291 | 74.68 | 13.86 | YP_001128693.1 | thioredoxin reductase                                            |
| 246 | 15  | 74.62 | 12.67 | YP_001128040.1 | RNA-binding protein Sun                                          |
| 247 | 382 | 74.61 | 12.42 | YP_001129180.1 | Hypothetical protein GBS222_1630                                 |
| 248 | 16  | 74.56 | 14.93 | YP_001128041.1 | serine/threonine protein phosphatase Stp1                        |
| 249 | 401 | 74.41 | 11.01 | YP_001129331.1 | ABC transporter (ATP-binding protein)                            |
| 253 | 235 | 74.18 | 11.92 | YP_001128412.1 | pantothenate kinase                                              |
| 254 | 322 | 74.12 | 11.89 | YP_001129026.1 | ADP-ribose pyrophosphatase                                       |
| 255 | 3   | 74.08 | 11.86 | YP_001127608.1 | peptidyl-tRNA hydrolase                                          |
| 256 | 216 | 74.06 | 9.95  | YP_001128029.2 | autoinducer-2/production protein (LuxS)                          |
| 257 | 343 | 73.79 | 13.71 | YP_001129113.1 | HD domain-containing protein                                     |
| 258 | 100 | 73.64 | 13.95 | YP_001127686.1 | Hypothetical protein GBS222_0316                                 |
| 259 | 6   | 73.57 | 14.68 | YP_001127991.1 | N-acetylglucosamine-6-phosphate deacetylase                      |
| 260 | 221 | 73.45 | 13.04 | YP_001127963.1 | cell-cycle regulation histidine triad (HIT) protein              |
| 261 | 108 | 73.45 | 10.62 | YP_001128171.1 | undecaprenyl-PP-MurNAc-pentapeptide-UDPGlcNAc GlcNAc transferase |
| 262 | 302 | 73.43 | 12.69 | YP_001128725.1 | 3-dehydroquinate dehydratase                                     |
| 264 | 172 | 73.38 | 14.49 | YP_001128553.1 | Hypothetical protein GBS222_0756                                 |
| 265 | 210 | 73.36 | 13.96 | YP_001129340.1 | recombination protein RecF                                       |
| 266 | 185 | 73.36 | 12.58 | YP_001128440.1 | transcriptional regulator (GntR family)                          |
| 267 | 330 | 73.33 | 11.08 | YP_001129076.1 | Hypothetical protein GBS222_1330                                 |
| 270 | 89  | 73    | 11.83 | YP_001127817.1 | NifU protein                                                     |
| 271 | 140 | 72.81 | 12.38 | YP_001128917.1 | prolipoprotein diacylglycerol transferase                        |
| 272 | 337 | 72.52 | 16.04 | YP_001129092.1 | primosome component (helicase loader) Dnal                       |
| 274 | 132 | 72.3  | 14.58 | YP_001128971.1 | glucosyl transferase                                             |
| 276 | 318 | 72.17 | 11.97 | YP_001128989.1 | formamidopyrimidine-DNA glycosylase                              |
| 277 | 181 | 72.08 | 11.12 | YP_001128413.1 | E. coli 16S RNA m2G1207 methyltransferase                        |
| 281 | 327 | 71.81 | 11.39 | YP_001129072.1 | segregation and condensation protein B                           |
| 282 | 24  | 71.74 | 11.96 | YP_001127944.1 | malonyl CoA-acyl carrier protein transacylase                    |
| 283 | 153 | 71.56 | 13.73 | YP_001128282.1 | DNA polymerase III subunit delta                                 |
| 285 | 115 | 71.47 | 15.12 | YP_001128193.1 | geranyltransferase (farnesyl diphosphate synthase)               |
| 286 | 303 | 71.41 | 12.47 | YP_001128726.1 | Hypothetical protein GBS222_1133                                 |
| 287 | 22  | 71.37 | 11.6  | YP_001127941.1 | beta-ketoacyl-ACP synthase III                                   |
| 288 | 284 | 71.25 | 16.18 | YP_001128672.1 | Isopentenyl diphosphate isomerase                                |
| 290 | 199 | 71.02 | 12.52 | YP_001127923.1 | hypothetical protein GBS222_1403                                 |
| 292 | 289 | 70.83 | 12.19 | YP_001128683.1 | poly(A) polymerase family protein                                |
| 295 | 20  | 70.53 | 14.92 | YP_001127939.1 | enoyl-CoA isomerase                                              |
| 297 | 275 | 70.41 | 15.27 | YP_001128631.1 | oxidoreductase                                                   |
| 298 | 178 | 70.34 | 13.85 | YP_001128370.1 | DNA polymerase III (alpha subunit)                               |
| 300 | 195 | 70.17 | 14.78 | YP_001128977.1 | putative sugar transferase                                       |
| 301 | 348 | 69.97 | 12.08 | YP_001127905.1 | alanine racemase                                                 |
| 304 | 44  | 69.64 | 13.99 | YP_001128415.1 | putative ABC transporter (binding protein)                       |
| 305 | 214 | 69.58 | 16.27 | YP_001128023.1 | penicillin-binding protein 1A                                    |
| 306 | 251 | 69.56 | 15.51 | YP_001128478.1 | Hypothetical protein GBS222_0896                                 |
| 307 | 328 | 69.54 | 12.55 | YP_001129073.1 | segregation and condensation protein A                           |
| 310 | 46  | 69.33 | 16.73 | YP_001127782.1 | membrane protein oxaA, putative                                  |
| 315 | 197 | 68.73 | 17.62 | YP_001129084.1 | OxaA-like protein precursor                                      |
| 317 | 19  | 68.43 | 12.55 | YP_001128047.1 | general stress protein GSP13                                     |
| 318 | 233 | 68.41 | 16.57 | YP_001128313.1 | transcriptional repressor of the biotin operon                   |
| 320 | 308 | 68.12 | 18.26 | YP_001129055.1 | Hypothetical protein GBS222_1143                                 |



## RBH-GETHOMOLOGUES shared hits

|     |     |       |       |                |                                                                       |
|-----|-----|-------|-------|----------------|-----------------------------------------------------------------------|
| 321 | 204 | 67.88 | 16.53 | YP_001127876.1 | signal peptidase 1                                                    |
| 324 | 273 | 67.61 | 16.28 | YP_001128628.1 | DNA replication protein DnaD, putative                                |
| 325 | 188 | 67.32 | 12.42 | YP_001128501.1 | iron-sulfur cofactor synthesis protein or cysteine desulfurase        |
| 326 | 110 | 67.17 | 13.24 | YP_001128175.1 | Hypothetical protein GBS222_0458                                      |
| 328 | 31  | 67.07 | 18.87 | YP_001127958.1 | Xanthine/uracil permease family protein                               |
| 339 | 163 | 65.14 | 21.9  | YP_001128771.1 | H <sup>+</sup> -transporting ATP synthase a chain                     |
| 341 | 203 | 64.95 | 12.8  | YP_001127877.1 | Ribonuclease HII                                                      |
| 342 | 352 | 64.92 | 21.6  | YP_001127899.1 | sucrose-specific PTS enzyme IIABC                                     |
| 345 | 92  | 64.68 | 17.43 | YP_001127824.1 | oligopeptide ABC transporter (ATP-binding protein)                    |
| 349 | 228 | 64.24 | 17.53 | YP_001128871.1 | metallo-beta-lactamase family protein                                 |
| 351 | 11  | 63.81 | 14.12 | YP_001128025.1 | Hypothetical protein GBS222_0062                                      |
| 355 | 41  | 63.09 | 19.81 | YP_001127976.1 | copper-transporting ATPase (CopA)                                     |
| 356 | 317 | 63.06 | 14.79 | YP_001128988.1 | dephosphocoenzyme A kinase                                            |
| 359 | 93  | 62.58 | 18.95 | YP_001127825.1 | putative oligopeptide ABC transporter, ATP-binding protein            |
| 362 | 217 | 62.46 | 13.93 | YP_001128049.1 | Hypothetical protein GBS222_0092                                      |
| 363 | 170 | 62.46 | 15.61 | YP_001128753.1 | ATP-dependent exonuclease, subunit A                                  |
| 364 | 173 | 61.69 | 24.17 | YP_001128552.1 | Hypothetical protein GBS222_0757                                      |
| 374 | 282 | 59.09 | 17.93 | YP_001128668.1 | dihydrofolate reductase                                               |
| 377 | 403 | 58.88 | 20.05 | YP_001129335.1 | zinc dependent peptidase                                              |
| 381 | 338 | 57.91 | 17.47 | YP_001129097.1 | Hypothetical protein GBS222_1356                                      |
| 385 | 212 | 56.87 | 16.88 | YP_001129346.1 | unknown transmembrane protein                                         |
| 390 | 225 | 56.05 | 17.57 | YP_001127820.1 | serine-type D-Ala-D-Ala carboxypeptidase (penicillin binding protein) |
| 391 | 48  | 55.77 | 34.57 | YP_001127790.1 | N-acetylneuraminase lyase, putative                                   |
| 395 | 112 | 54.23 | 19.2  | YP_001128178.1 | S4 domain-containing protein                                          |
| 398 | 49  | 52.36 | 28.03 | YP_001127791.1 | glucose kinase and to XylR transcriptional regulator                  |
| 404 | 288 | 42.63 | 22.63 | YP_001127771.1 | ABC transporter, ATP-binding/permease protein                         |

## RBH Unique hits

| Position | Sequence number | Genus            |  | SD    | Accession                   |  | Annotation                                                         |
|----------|-----------------|------------------|--|-------|-----------------------------|--|--------------------------------------------------------------------|
|          |                 | Average identity |  |       | (S. pyogenes str. Manfredo) |  |                                                                    |
| 4        | 54              | 97.93            |  | 1.81  | YP_001127641.1              |  | 30S ribosomal protein S10                                          |
| 9        | 396             | 97.1             |  | 1.8   | YP_001129319.1              |  | 30S ribosomal protein S4                                           |
| 15       | 55              | 96.01            |  | 2.75  | YP_001127642.1              |  | 50S ribosomal protein L3                                           |
| 19       | 366             | 95.45            |  | 2.79  | YP_001127843.1              |  | phosphoglycerate kinase                                            |
| 20       | 106             | 95.45            |  | 2.89  | YP_001128168.1              |  | putative GTP-binding elongation factor                             |
| 30       | 56              | 94.21            |  | 4.97  | YP_001127643.1              |  | 50S ribosomal protein L4                                           |
| 37       | 211             | 93.66            |  | 3.68  | YP_001129345.1              |  | ABC transporter (ATP-binding protein)                              |
| 41       | 325             | 93.11            |  | 4.58  | YP_001129053.1              |  | ATP-dependent CLP protease proteolytic subunit                     |
| 42       | 305             | 92.89            |  | 6.45  | YP_001128730.1              |  | translation initiation factor IF-3                                 |
| 44       | 399             | 92.14            |  | 3.32  | YP_001129325.1              |  | tRNA (5-methylaminomethyl-2-thiouridylate)-methyltransferase       |
| 46       | 383             | 91.94            |  | 3.87  | YP_001129237.1              |  | chaperonin GroEL                                                   |
| 48       | 262             | 91.58            |  | 5.19  | YP_001128642.1              |  | ribosomal protein S1-like DNA-binding protein                      |
| 51       | 28              | 91.01            |  | 3.84  | YP_001127948.1              |  | beta-hydroxyacyl-ACP dehydratase                                   |
| 54       | 387             | 90.61            |  | 6.5   | YP_001129271.1              |  | transcriptional regulator Spx                                      |
| 56       | 265             | 90.01            |  | 5.04  | YP_001128647.1              |  | DNA topoisomerase IV (subunit B)                                   |
| 59       | 14              | 89.83            |  | 6.38  | YP_001128037.1              |  | Hypothetical protein GBS222_0074                                   |
| 65       | 159             | 89.29            |  | 5.7   | YP_001128320.1              |  | methionine aminopeptidase                                          |
| 68       | 84              | 88.96            |  | 6.15  | YP_001127837.1              |  | fructose-bisphosphate aldolase class-II                            |
| 71       | 234             | 88.82            |  | 5.67  | YP_001128532.1              |  | putative tRNA modification GTPase TrmE                             |
| 75       | 144             | 88.6             |  | 7.06  | YP_001128912.1              |  | U32 family peptidase                                               |
| 76       | 220             | 88.53            |  | 5.92  | YP_001127956.1              |  | PTS system, mannose-specific IIAB components                       |
| 81       | 386             | 87.48            |  | 6.44  | YP_001129266.1              |  | anaerobic (class III) ribonucleotide reductase large subunit chain |
| 89       | 345             | 86.61            |  | 7.38  | YP_001129116.1              |  | GTP-binding protein YqeH                                           |
| 90       | 263             | 86.41            |  | 7.35  | YP_001128644.1              |  | branched-chain-amino-acid aminotransferase                         |
| 95       | 241             | 86.02            |  | 7.76  | YP_001128406.1              |  | phosphate ABC transporter (ATP-binding protein)                    |
| 102      | 356             | 85.54            |  | 11.11 | YP_001127890.1              |  | Putative transport protein                                         |
| 103      | 196             | 85.47            |  | 7.13  | YP_001129044.1              |  | 3-exo-deoxyribonuclease                                            |
| 106      | 349             | 85.33            |  | 7.43  | YP_001127903.1              |  | preprotein translocase SecA subunit                                |
| 107      | 281             | 85.32            |  | 6.41  | YP_001128665.1              |  | hypothetical GTP-binding protein                                   |
| 112      | 37              | 85.03            |  | 8.04  | YP_001127970.1              |  | Hypothetical protein GBS222_0134                                   |
| 115      | 357             | 84.81            |  | 9.25  | YP_001127887.1              |  | single strand binding protein                                      |
| 117      | 70              | 84.71            |  | 10.34 | YP_001127662.1              |  | preprotein translocase SecY                                        |
| 118      | 250             | 84.69            |  | 6.78  | YP_001128430.1              |  | formate-tetrahydrofolate ligase                                    |
| 120      | 182             | 84.63            |  | 9.81  | YP_001128475.1              |  | NADH Oxidase                                                       |
| 122      | 258             | 84.59            |  | 8.5   | YP_001128518.1              |  | spermidine/putrescine ABC transporter (permease)                   |
| 132      | 254             | 84.19            |  | 9.69  | YP_001128485.1              |  | thymidine kinase                                                   |
| 138      | 191             | 84.01            |  | 7.72  | YP_001128657.1              |  | transcriptional regulator (LysR family)                            |
| 147      | 257             | 83.28            |  | 9     | YP_001128517.1              |  | spermidine/putrescine ABC transporter (permease)                   |
| 148      | 82              | 83.27            |  | 7.6   | YP_001127833.1              |  | trigger factor (prolyl isomerase)                                  |
| 149      | 294             | 83.26            |  | 10.18 | YP_001128710.1              |  | pyrimidine biosynthetic operon repressor                           |
| 151      | 264             | 82.84            |  | 8.9   | YP_001128645.1              |  | topoisomerase IV subunit A                                         |
| 152      | 83              | 82.84            |  | 8.1   | YP_001127774.1              |  | deoxyuridine 5-triphosphate nucleotidhydrolase (dUTPase)           |
| 154      | 266             | 82.74            |  | 9.4   | YP_001128564.1              |  | metallo-beta-lactamase family protein                              |
| 160      | 240             | 82.24            |  | 11.62 | YP_001128407.1              |  | phosphate uptake regulatory protein                                |
| 173      | 310             | 80.57            |  | 10.34 | YP_001129063.1              |  | pyruvate-formate lyase activating enzyme                           |
| 175      | 7               | 80.45            |  | 9.29  | YP_001127995.1              |  | glycyl-tRNA synthetase (beta subunit)                              |
| 187      | 391             | 79.74            |  | 10.11 | YP_001129277.1              |  | DNA mismatch repair MutL                                           |
| 191      | 247             | 79.46            |  | 10.79 | YP_001128649.1              |  | dihydroorotase                                                     |
| 192      | 290             | 79.4             |  | 8.24  | YP_001128689.1              |  | Fructose-1-phosphate kinase                                        |
| 198      | 143             | 79.03            |  | 12.44 | YP_001128913.1              |  | U32 family peptidase                                               |
| 201      | 243             | 78.73            |  | 11.61 | YP_001128402.1              |  | Phosphate ABC transporter, phosphate-binding protein               |
| 204      | 267             | 78.48            |  | 9.61  | YP_001128566.1              |  | ABC transporter (permease)                                         |
| 206      | 200             | 78.2             |  | 9.18  | YP_001127921.1              |  | L-asparaginase                                                     |
| 208      | 117             | 78.14            |  | 11.59 | YP_001128196.1              |  | DNA repair and recombination protein RecN                          |
| 211      | 256             | 78.05            |  | 13.32 | YP_001128516.1              |  | spermidine/putrescine ABC transporter (binding protein)            |
| 214      | 362             | 77.88            |  | 12.19 | YP_001127858.1              |  | Hypothetical protein GBS222_1473                                   |
| 217      | 351             | 77.78            |  | 9.51  | YP_001127901.1              |  | fructokinase                                                       |
| 218      | 194             | 77.73            |  | 9.85  | YP_001128349.1              |  | glutamine ABC transporter permease and substrate binding protein   |
| 223      | 189             | 77.4             |  | 10.21 | YP_001128502.1              |  | Hypothetical protein GBS222_0922                                   |
| 227      | 340             | 77.19            |  | 12.78 | YP_001129105.1              |  | ABC transporter (permease)                                         |
| 229      | 202             | 76.94            |  | 14.08 | YP_001127897.1              |  | transcriptional regulator (LacI family)                            |
| 232      | 10              | 76.67            |  | 13.06 | YP_001128015.1              |  | amino acid ABC transporter (permease)                              |
| 242      | 297             | 75.31            |  | 12.69 | YP_001128713.1              |  | transcriptional regulator (LysR/MarR family)                       |
| 250      | 376             | 74.38            |  | 11.7  | YP_001129165.1              |  | M50A family peptidase                                              |
| 251      | 145             | 74.36            |  | 10.86 | YP_001128899.1              |  | phosphoenolpyruvate carboxylase                                    |
| 252      | 118             | 74.28            |  | 11.77 | YP_001128198.1              |  | DegV family protein                                                |
| 263      | 323             | 73.4             |  | 17.67 | YP_001129049.1              |  | DNA replication initiation control protein YabA                    |
| 268      | 246             | 73.21            |  | 12.79 | YP_001128466.1              |  | ribonuclease HII                                                   |
| 269      | 332             | 73.1             |  | 15.29 | YP_001129080.1              |  | Hypothetical protein GBS222_1336                                   |
| 273      | 339             | 72.33            |  | 18.12 | YP_001129099.1              |  | LemA family protein                                                |
| 275      | 218             | 72.18            |  | 12.45 | YP_001127953.1              |  | Hypothetical protein GBS222_0114                                   |
| 278      | 261             | 71.96            |  | 21.45 | YP_001128709.1              |  | uracil permease                                                    |
| 279      | 81              | 71.87            |  | 10.74 | YP_001127831.1              |  | Hypothetical protein GBS222_0254                                   |
| 280      | 160             | 71.85            |  | 13.7  | YP_001128775.1              |  | Hypothetical protein GBS222_0720                                   |

## RBH Unique hits

|     |     |       |       |                |                                                                   |
|-----|-----|-------|-------|----------------|-------------------------------------------------------------------|
| 284 | 286 | 71.47 | 15.87 | YP_001128674.1 | mevalonate diphosphate decarboxylase                              |
| 289 | 271 | 71.14 | 12.14 | YP_001128625.1 | NIF3 family protein                                               |
| 291 | 124 | 70.91 | 16.9  | YP_001128800.1 | metal ABC transporter (binding protein)                           |
| 293 | 392 | 70.71 | 19.25 | YP_001129297.1 | arginine repressor ArgR                                           |
| 294 | 192 | 70.65 | 11.74 | YP_001128670.1 | 3-hydroxy-3-methylglutaryl-coenzyme A synthase (HMG-CoA synthase) |
| 296 | 314 | 70.49 | 14.67 | YP_001128363.1 | 4-alpha-glucanotransferase (amylomaltase)                         |
| 299 | 94  | 70.22 | 16.73 | YP_001127671.1 | transcriptional regulator                                         |
| 302 | 209 | 69.78 | 17.06 | YP_001129318.1 | transcriptional regulator (TetR/AcrR family)                      |
| 303 | 365 | 69.71 | 13.49 | YP_001127844.1 | Hypothetical protein GBS222_1486                                  |
| 308 | 232 | 69.49 | 15.93 | YP_001128904.1 | bacteriophage endolysin                                           |
| 309 | 213 | 69.4  | 17.17 | YP_001129348.1 | serine protease                                                   |
| 311 | 278 | 69.31 | 14.91 | YP_001129006.1 | Hypothetical protein GBS222_1047                                  |
| 312 | 131 | 69.16 | 21.67 | YP_001128972.1 | hexosyltransferase                                                |
| 313 | 45  | 69.05 | 14.79 | YP_001127781.1 | ribonuclease P protein component                                  |
| 314 | 127 | 68.75 | 12.45 | YP_001128322.1 | 5-enolpyruvylshikimate-3-phosphate synthase                       |
| 316 | 272 | 68.71 | 12.74 | YP_001128626.1 | Hypothetical protein GBS222_1032                                  |
| 319 | 201 | 68.13 | 14.53 | YP_001127898.1 | sucrose-6-phosphate hydrolase                                     |
| 322 | 296 | 67.65 | 14.64 | YP_001128712.1 | prolipoprotein signal peptidase                                   |
| 323 | 85  | 67.65 | 17.62 | YP_001127812.1 | competence negative regulator mecA                                |
| 327 | 184 | 67.13 | 19.77 | YP_001128472.1 | sortase family protein                                            |
| 329 | 27  | 67.06 | 13.06 | YP_001127947.1 | biotin carboxyl carrier protein                                   |
| 330 | 8   | 67.06 | 19.49 | YP_001128011.1 | cell division protein FtsL                                        |
| 331 | 245 | 66.92 | 14.07 | YP_001128397.1 | macrolide-efflux protein                                          |
| 332 | 17  | 66.74 | 19.07 | YP_001128044.1 | two-component sensor histidine kinase                             |
| 333 | 138 | 66.5  | 12.69 | YP_001128928.1 | signal recognition particle and to cell division protein FtsY     |
| 334 | 389 | 66.02 | 16.91 | YP_001129274.1 | 3-methyl-adenine DNA glycosylase I                                |
| 335 | 186 | 65.89 | 14.38 | YP_001128420.1 | Hypothetical protein GBS222_0891                                  |
| 336 | 51  | 65.85 | 13.36 | YP_001127635.1 | protein-tyrosine phosphatase                                      |
| 337 | 141 | 65.71 | 18.02 | YP_001128916.1 | Hypothetical protein GBS222_0611                                  |
| 338 | 136 | 65.68 | 14.27 | YP_001128952.1 | chromosome segregation SMC protein                                |
| 340 | 252 | 65.04 | 14.62 | YP_001128483.1 | HemK family modification methylase                                |
| 343 | 32  | 64.84 | 17.48 | YP_001127961.1 | transcription regulator, hypothetical                             |
| 344 | 300 | 64.78 | 19.2  | YP_001128723.1 | Hypothetical protein GBS222_1129                                  |
| 346 | 384 | 64.57 | 16.66 | YP_001129238.1 | chaperonin GroES                                                  |
| 347 | 355 | 64.46 | 21.04 | YP_001127889.1 | Hypothetical protein GBS222_1431                                  |
| 348 | 231 | 64.3  | 15.41 | YP_001128907.1 | putative phosphoglycerate mutase                                  |
| 350 | 277 | 63.91 | 16.9  | YP_001128633.1 | Hypothetical protein GBS222_1039                                  |
| 352 | 187 | 63.51 | 15.85 | YP_001128499.1 | hypothetical protein GBS222_0919                                  |
| 353 | 341 | 63.39 | 18.9  | YP_001128504.1 | glutamine amidotransferase class I                                |
| 354 | 47  | 63.24 | 19.31 | YP_001127783.1 | R3H domain-containing protein                                     |
| 357 | 224 | 63.03 | 18.73 | YP_001127832.1 | Hypothetical protein GBS222_0255                                  |
| 358 | 164 | 62.92 | 21.52 | YP_001128770.1 | H+-transporting ATP synthase b chain                              |
| 360 | 385 | 62.55 | 16.84 | YP_001129263.1 | acetyltransferase                                                 |
| 361 | 208 | 62.52 | 13.27 | YP_001129234.1 | ribosomal large subunit pseudouridine synthase A                  |
| 365 | 53  | 61.31 | 16.5  | YP_001127640.1 | MATE efflux family protein                                        |
| 366 | 324 | 61.06 | 19.23 | YP_001129050.1 | DNA polymerase III (delta subunit)                                |
| 367 | 129 | 60.98 | 16.33 | YP_001128324.1 | membrane bound transcriptional regulator                          |
| 368 | 80  | 60.85 | 14.5  | YP_001127829.1 | phosphomethylpyrimidine kinase                                    |
| 369 | 268 | 60.64 | 15.87 | YP_001128568.1 | hypothetical protein GBS222_1018                                  |
| 370 | 116 | 60.48 | 22.35 | YP_001128195.1 | transcriptional regulator, arginine repressor, putative           |
| 371 | 104 | 59.68 | 15.88 | YP_001128158.1 | phosphopantetheine adenylyltransferase                            |
| 372 | 176 | 59.34 | 20.24 | YP_001128548.1 | thioesterase                                                      |
| 373 | 137 | 59.13 | 21.1  | YP_001128930.1 | Cof-like hydrolase family protein                                 |
| 375 | 165 | 59    | 22.86 | YP_001128769.1 | H+-transporting ATP synthase delta chain                          |
| 376 | 379 | 58.98 | 21.46 | YP_001129168.1 | preprotein translocase subunit YajC                               |
| 378 | 52  | 58.52 | 17.99 | YP_001127636.1 | Hypothetical protein GBS222_0202                                  |
| 379 | 5   | 58.52 | 16.54 | YP_001127614.1 | tRNA(Ile)-lysidine synthase                                       |
| 380 | 128 | 58.22 | 16.04 | YP_001128323.1 | shikimate kinase                                                  |
| 382 | 285 | 57.88 | 18.47 | YP_001128673.1 | phosphomevalonate kinase                                          |
| 383 | 4   | 57.83 | 18.77 | YP_001127613.1 | weakly beta-lactamase                                             |
| 384 | 119 | 57.11 | 18.07 | YP_001128889.1 | Hypothetical protein GBS222_0490                                  |
| 386 | 111 | 56.57 | 18.19 | YP_001128176.1 | Hypothetical protein GBS222_0459                                  |
| 387 | 34  | 56.39 | 17.84 | YP_001127965.1 | ABC transporter (permease)                                        |
| 388 | 105 | 56.23 | 18.46 | YP_001128161.1 | Hypothetical protein GBS222_0435                                  |
| 389 | 312 | 56.13 | 17.98 | YP_001129067.1 | PAP2 family protein                                               |
| 392 | 361 | 54.69 | 17.98 | YP_001127879.1 | Hypothetical protein GBS222_1441                                  |
| 393 | 402 | 54.41 | 19.22 | YP_001129334.1 | zinc dependent peptidase                                          |
| 394 | 78  | 54.34 | 19.62 | YP_001128433.1 | GntR family transcriptional regulator                             |
| 396 | 99  | 54.16 | 20.99 | YP_001127678.1 | Hypothetical protein GBS222_0311                                  |
| 397 | 329 | 53.06 | 19.26 | YP_001129074.1 | integrase                                                         |
| 399 | 335 | 50.54 | 20.45 | YP_001129089.1 | Hypothetical protein GBS222_1348                                  |
| 400 | 287 | 50.5  | 23.81 | YP_001127772.1 | ABC transporter, ATP-binding/permease protein                     |
| 401 | 142 | 48.99 | 24.37 | YP_001128915.1 | Hypothetical protein GBS222_0612                                  |
| 402 | 269 | 46.95 | 28.77 | YP_001128182.1 | NUDIX family hydrolase                                            |
| 403 | 91  | 43.95 | 27.79 | YP_001127823.1 | oligopeptide ABC transporter (permease)                           |

# GETHOMOLOGUES unique hits

| Gene ID | Genus | Average Identity | SD   | Reference      | Accession | Annotation                                                                                            |
|---------|-------|------------------|------|----------------|-----------|-------------------------------------------------------------------------------------------------------|
| 8       |       | 97.46            | 1.7  | YP_007968185.1 |           | 30S ribosomal protein S9                                                                              |
| 33      |       | 96.95            | 2.1  | YP_007968954.1 |           | 50S ribosomal protein L11                                                                             |
| 1       |       | 95.71            | 2.1  | YP_007967888.1 |           | glycyl-tRNA synthetase (alpha subunit)                                                                |
| 14      |       | 94.43            | 3.7  | YP_007968324.1 |           | ribosomal protein L19                                                                                 |
| 45      |       | 92.38            | 3.9  | YP_007969161.1 |           | metallo-beta-lactamase family protein                                                                 |
| 4       |       | 92.22            | 5.2  | YP_007968011.1 |           | ribose-phosphate pyrophosphokinase                                                                    |
| 38      |       | 91.86            | 4.1  | YP_007969003.1 |           | uracil phosphoribosyltransferase                                                                      |
| 9       |       | 91.28            | 4.4  | YP_007968234.1 |           | valyl-tRNA synthetase                                                                                 |
| 41      |       | 90.85            | 4.8  | YP_007969060.1 |           | Hypothetical protein GBS222_1374                                                                      |
| 15      |       | 90.56            | 4.6  | YP_007968327.1 |           | DNA gyrase, subunit B                                                                                 |
| 21      |       | 89.73            | 4.8  | YP_007968478.1 |           | S-adenosylmethionine synthetase                                                                       |
| 31      |       | 89.4             | 6.9  | YP_007968914.1 |           | Glutamine ABC transporter ATP-binding protein                                                         |
| 46      |       | 89.04            | 6.1  | YP_007969179.1 |           | 16 rRNA (adenine-N6,N6-)dimethyltransferase                                                           |
| 24      |       | 88.56            | 5.7  | YP_007968644.1 |           | phosphoglucomutase                                                                                    |
| 50      |       | 88.08            | 5.8  | YP_007969294.1 |           | recombination factor protein RarA                                                                     |
| 2       |       | 86.13            | 7.2  | YP_007967906.1 |           | ATP-dependent RNA helicase                                                                            |
| 22      |       | 86.08            | 6.5  | YP_007968606.1 |           | DNA topoisomerase I                                                                                   |
| 6       |       | 85.88            | 7.6  | YP_007968117.1 |           | Hypothetical protein GBS222_0281                                                                      |
| 12      |       | 85.62            | 8.7  | YP_007968297.1 |           | cation-transporting P-ATPase                                                                          |
| 10      |       | 85.54            | 6.2  | YP_007968273.1 |           | ATP-dependent protease ClpE                                                                           |
| 35      |       | 84.96            | 7.0  | YP_007968982.1 |           | methionyl-tRNA synthetase                                                                             |
| 32      |       | 84.59            | 7.6  | YP_007968938.1 |           | putative metalloprotease                                                                              |
| 3       |       | 82.66            | 9.1  | YP_007967945.1 |           | ribosomal subunit interface protein                                                                   |
| 49      |       | 81.63            | 9.2  | YP_007969286.1 |           | ribosomal protein L11 methyltransferase                                                               |
| 40      |       | 80.47            | 10.7 | YP_007969055.1 |           | ABC transporter (ATP-binding protein)                                                                 |
| 27      |       | 79.98            | 9.6  | YP_007968750.1 |           | hypothetical fibronectin-binding protein                                                              |
| 7       |       | 79.31            | 9.9  | YP_007968176.1 |           | serine acetyltransferase                                                                              |
| 18      |       | 78.81            | 12.5 | YP_007968389.1 |           | permease, putative                                                                                    |
| 34      |       | 78.55            | 9.3  | YP_007968969.1 |           | UDP-N-acetylglucosamine pyrophosphorylase                                                             |
| 20      |       | 78.41            | 11.8 | YP_007968456.1 |           | group B oligopeptidase PepB                                                                           |
| 43      |       | 78.09            | 14.3 | YP_007969075.1 |           | HAD superfamily hydrolase                                                                             |
| 11      |       | 77.94            | 10.3 | YP_007968278.1 |           | bifunctional methylenetetrahydrofolate dehydrogenase / methenyltetrahydrofolate cyclohydrolase (FoID) |
| 48      |       | 77.11            | 13.9 | YP_007969224.1 |           | transcriptional regulator CtsR                                                                        |
| 42      |       | 76.5             | 12.5 | YP_007969069.1 |           | iojap-related protein                                                                                 |
| 16      |       | 75.86            | 15.5 | YP_007968328.1 |           | negative regulator of FtsZ ring formation protein EzrA                                                |
| 39      |       | 75.84            | 8.9  | YP_007969005.1 |           | rRNA methylase                                                                                        |
| 17      |       | 75.6             | 11.8 | YP_007968336.1 |           | 23S rRNA (uracil-5-)-methyltransferase RumA                                                           |
| 47      |       | 75.56            | 11.3 | YP_007969183.1 |           | TatD family hydrolase                                                                                 |
| 30      |       | 73.18            | 23.4 | YP_007968903.1 |           | preprotein translocase secA                                                                           |
| 28      |       | 72.18            | 12.8 | YP_007968771.1 |           | tRNA isopentenylpyrophosphate transferase                                                             |
| 26      |       | 71.19            | 11.7 | YP_007968720.1 |           | putative glycerol-3-phosphate acyltransferase PlsY                                                    |
| 36      |       | 70.88            | 14.5 | YP_007968988.1 |           | hypothetical protein GBS222_1298                                                                      |
| 37      |       | 70.8             | 12.2 | YP_007968997.1 |           | thymidylate kinase                                                                                    |
| 13      |       | 70.56            | 13.4 | YP_007968319.1 |           | DHH family protein                                                                                    |
| 19      |       | 70.11            | 14.3 | YP_007968451.1 |           | N-acetylglucosamine-6-phosphate isomerase                                                             |
| 5       |       | 67.86            | 11.8 | YP_007968013.1 |           | DNA repair protein RecO                                                                               |
| 23      |       | 66.25            | 20.3 | YP_007968630.1 |           | cardiolipin synthetase                                                                                |
| 51      |       | 62.62            | 16.9 | YP_007969410.1 |           | Partitioning protein, ParB family                                                                     |
| 29      |       | 61.95            | 18.3 | YP_007968866.1 |           | Hypothetical protein GBS222_1156                                                                      |
| 25      |       | 60.18            | 18.9 | YP_007968686.1 |           | folyl-polyglutamate synthetase                                                                        |
| 44      |       | 54.89            | 21.9 | YP_007969090.1 |           | shikimate 5-dehydrogenase                                                                             |
