# Supplementary material for: Global genomic similarity and core genome sequence diversity of the Streptococcus genus as a toolkit to identify closely related bacterial species in complex environments
Source: PubMed Central journal article supplement (PMC6336011; doi:10.7717/peerj.6233), 2019-01-14

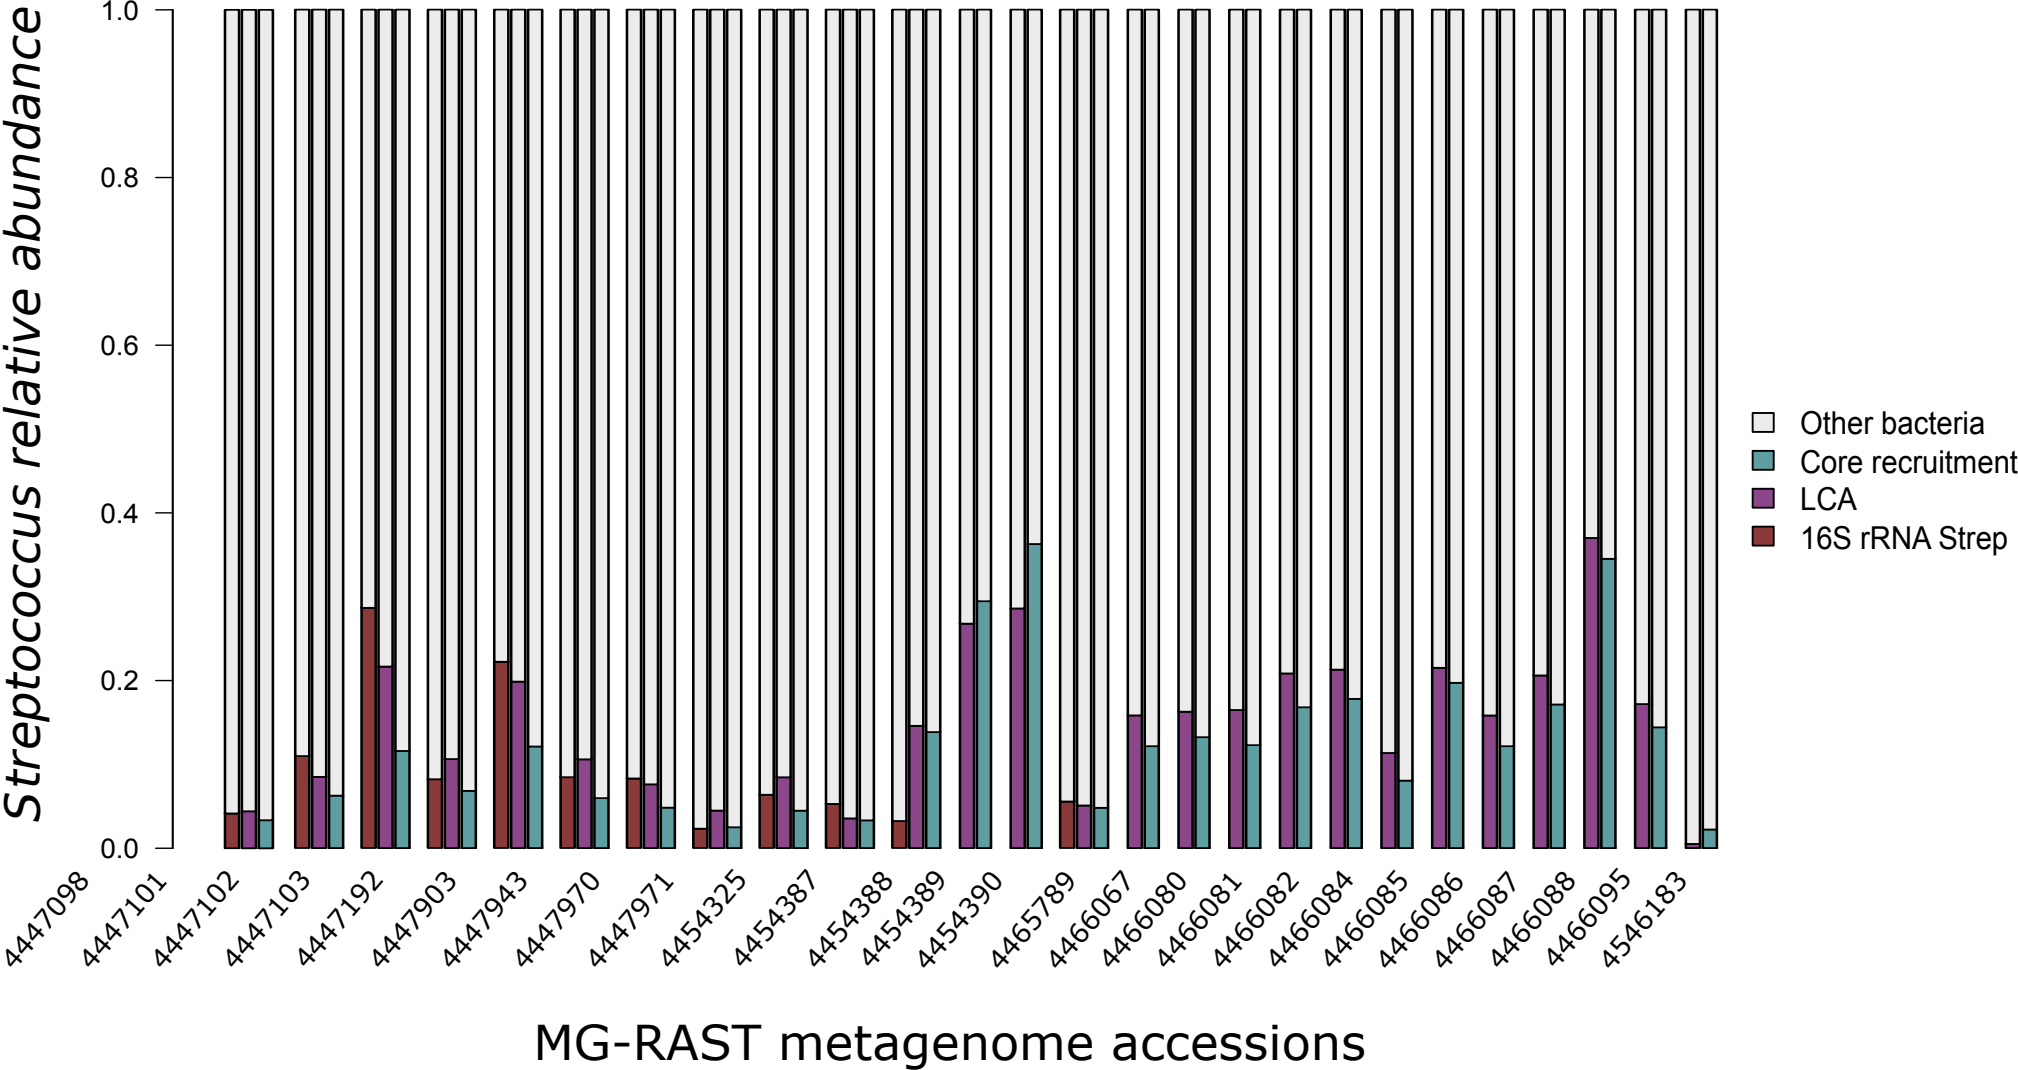

Supplement: peerj-07-6233-s008.pdf [file peerj-07-6233-s008.pdf]
